# Supplementary material for: Calorimetric Analysis of the Interplay between Synthetic Tn Antigen-Presenting MUC1 Glycopeptides and Human Macrophage Galactose-Type Lectin
Source: PubMed Central journal article supplement — Biochemistry. 2021 Feb 9;60(7):547–58. doi: 10.1021/acs.biochem.0c00942 (PMC8269692; doi:10.1021/acs.biochem.0c00942), 2021-02-09

# Supporting Information

## Calorimetric Analysis of the Interplay between Synthetic Tn Antigen-presenting MUC1 Glycopeptides and Human Macrophage Galactose-type Lectin

*Donella M. Beckwith<sup>1</sup>, Forrest G. FitzGerald<sup>1†</sup>, Maria C. Rodriguez Benavente<sup>1δ</sup>, Elizabeth R. Mercer<sup>1</sup>, Anna-Kristin Ludwig<sup>2</sup>, Malwina Michalak<sup>3</sup>, Herbert Kaltner<sup>2</sup>, Jürgen Kopitz<sup>3</sup>, Hans-Joachim Gabius<sup>2</sup>, and Maré Cudic<sup>1\*</sup>*

<sup>1</sup>Florida Atlantic University, Department of Chemistry and Biochemistry, Charles E. Schmidt College of Science, Boca Raton, FL 33431, United States

<sup>2</sup>Ludwig-Maximilians-University Munich, Institute of Physiological Chemistry, Faculty of Veterinary Medicine, Veterinärstr. 13, 80539 Munich, Germany

<sup>3</sup>Department of Applied Tumor Biology, Institute of Pathology, Medical School of the Ruprecht-Karls-University Heidelberg, Im Neuenheimer Feld 224, 69120 Heidelberg, Germany

### Table of Contents

| <b>Page</b> | <b>Content</b>                                                                                                                                                                                                                         |
|-------------|----------------------------------------------------------------------------------------------------------------------------------------------------------------------------------------------------------------------------------------|
| S1&S2       | Title page and table of contents.                                                                                                                                                                                                      |
| S3          | Figure S1. RP-HPLC chromatogram of purified glycosylated Fmoc-protected Thr building block <b>4</b> derived from Scheme 1.<br>Figure S2. MALDI-TOF mass spectrum of purified glycosylated Fmoc-protected Thr building block <b>4</b> . |
| S4          | Figure S3. <sup>1</sup> H NMR spectrum of purified glycosylated Fmoc-protected Thr building block <b>4</b> .<br>Figure S4. <sup>13</sup> C NMR spectrum of purified glycosylated Fmoc-protected Thr building block <b>4</b> .          |
| S5          | Figure S5. RP-HPLC chromatogram of purified glycosylated Fmoc-protected Thr building block <b>5</b> derived from Scheme 1.<br>Figure S6. MALDI-TOF mass spectrum of purified glycosylated Fmoc-protected Thr building block <b>5</b> . |

| <b>Page</b> | <b>Content</b>                                                                                                                                                                                                                |
|-------------|-------------------------------------------------------------------------------------------------------------------------------------------------------------------------------------------------------------------------------|
| S6          | Figure S7. <sup>1</sup> H NMR spectrum of purified glycosylated Fmoc-protected Thr building block <b>5</b> .<br>Figure S8. <sup>13</sup> C NMR spectrum of purified glycosylated Fmoc-protected Thr building block <b>5</b> . |
| S7          | Figure S9. General synthesis scheme of glycopeptides.                                                                                                                                                                         |
| S8          | Figure S10. RP-HPLC chromatogram of purified MUC1 ( <b>6</b> ).<br>Figure S11. MALDI-TOF mass spectrum of purified MUC1 ( <b>6</b> ).                                                                                         |
| S9          | Figure S12. RP-HPLC chromatogram of purified MUC1-Thr4 ( <b>7</b> ).<br>Figure S13. MALDI-TOF mass spectrum of purified MUC1-Thr4 ( <b>7</b> ).                                                                               |
| S10         | Figure S14. RP-HPLC chromatogram of purified MUC1-Thr9 ( <b>8</b> ).<br>Figure S15. MALDI-TOF mass spectrum of purified MUC1-Thr9 ( <b>8</b> ).                                                                               |
| S11         | Figure S16. RP-HPLC chromatogram of purified MUC1-Thr16 ( <b>9</b> ).<br>Figure S17. MALDI-TOF mass spectrum of purified MUC1-Thr16 ( <b>9</b> ).                                                                             |
| S12         | Figure S18. RP-HPLC chromatogram of purified MUC1-Thr9,16 ( <b>10</b> ).<br>Figure S19. MALDI-TOF mass spectrum of purified MUC1-Thr9,16 ( <b>10</b> ).                                                                       |
| S13         | Figure S20. RP-HPLC chromatogram of purified MUC1-Thr4,16 ( <b>11</b> ).<br>Figure S21. MALDI-TOF mass spectrum of purified MUC1-Thr4,16 ( <b>11</b> ).                                                                       |
| S14         | Figure S22. RP-HPLC chromatogram of purified MUC1-Thr4,9 ( <b>12</b> ).<br>Figure S23. MALDI-TOF mass spectrum of purified MUC1-Thr4,9 ( <b>12</b> ).                                                                         |
| S15         | Figure S24. RP-HPLC chromatogram of purified MUC1-Thr4, 9,16 ( <b>13</b> ).<br>Figure S25. MALDI-TOF mass spectrum of purified MUC1-Thr4,9, 16 ( <b>13</b> ).                                                                 |
| S16         | Figure S26. Circular dichroism (CD) spectrum of MUC1 (glycol)peptides in buffered (A) water (H <sub>2</sub> O) and (B) deuterium oxide (D <sub>2</sub> O).                                                                    |
| S17         | Figure S27A. Molecular mass determination of hMGL by MALDI-TOF mass spectrum.                                                                                                                                                 |
| S18         | Figure S27B. Tryptic peptide mass fingerprinting of hMGL by MALDI-TOF mass spectrum.                                                                                                                                          |
| S19         | Figure S27C. Chymotryptic peptide mass fingerprinting of hMGL by MALDI-TOF mass spectrum.                                                                                                                                     |
| S20         | Figure S27D. Combined sequence coverage of tryptic and chymotryptic peptide mass fingerprinting of hMGL by MALDI-TOF mass spectrum.                                                                                           |
| S21         | Figure S28. ITC titration profiles and signature plots of (A) α/β-GalNAc, (B) Thr-Tn, (C) α-Me-GalNAc, and (D) β-Me-GalNAc with hMGL in buffered water and ITC signature plots.                                               |
| S22         | Figure S29. ITC titration profiles of (A) MUC1-Thr4, (B) MUC1-Thr9, and (C) MUC1-Thr16 with hMGL in buffered water.                                                                                                           |
| S23         | Figure S29. ITC titration profiles of (D) MUC1-Thr9,16, (E) MUC1-Thr4,16, (F) MUC1-Thr4,9, and (G) MUC1-Thr4,9,16 with hMGL in buffered water and ITC signature plots.                                                        |
| S24         | Figure S30. ITC titration profiles of (A) MUC1-Thr4, (B) MUC1-Thr9, and (C) MUC1-Thr16 with hMGL in buffered deuterium oxide.                                                                                                 |
| S25         | Figure S30. ITC titration profiles of (D) MUC1-Thr9,16, (E) MUC1-Thr4,16, (F) MUC1-Thr4,9, and (G) MUC1-Thr4,9,16, with hMGL in buffered deuterium oxide and ITC signature plots.                                             |
| S26         | Figure S31. NITPIC/SEDPHAT thermodynamic values in water.                                                                                                                                                                     |
| S27         | Figure S31. NITPIC/SEDPHAT thermodynamic values in deuterium oxide.                                                                                                                                                           |
| S28         | Figure S32. AFFINImeter KinITC data in water.                                                                                                                                                                                 |
| S29         | Figure S33. AFFINImeter KinITC data in deuterium oxide.                                                                                                                                                                       |

## Thr-Azide

**Figure S1.** RP-HPLC spectrum of purified glycosylated Fmoc-protected Thr building block **4** from Scheme 1.

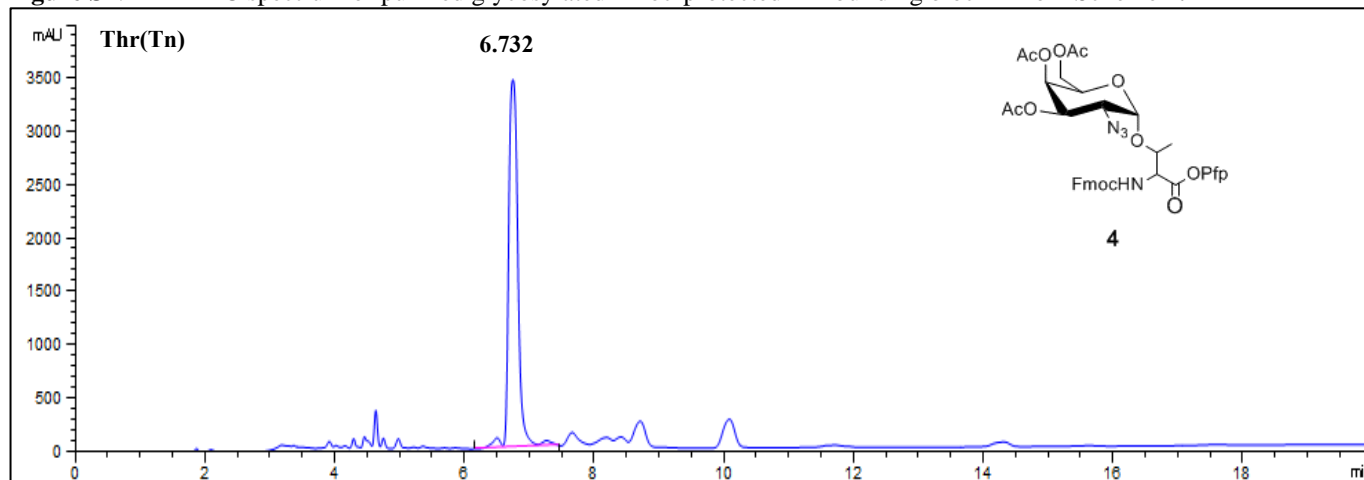

HPLC analysis of purified glycosylated Fmoc-protected Thr building block **4** derived from Scheme 1. Eluents were 0.1% TFA in water (A) and 0.1% TFA in acetonitrile (B). The elution gradient was 60-100% B in 20 mins with a flow rate of 1.0 mL/min. Detection was at wavelength = 214 nm. Retention time (min) = 6.732.

**Figure S2.** MALDI-TOF MS spectrum of purified glycosylated Fmoc-protected Thr building block **4** from Scheme 1.

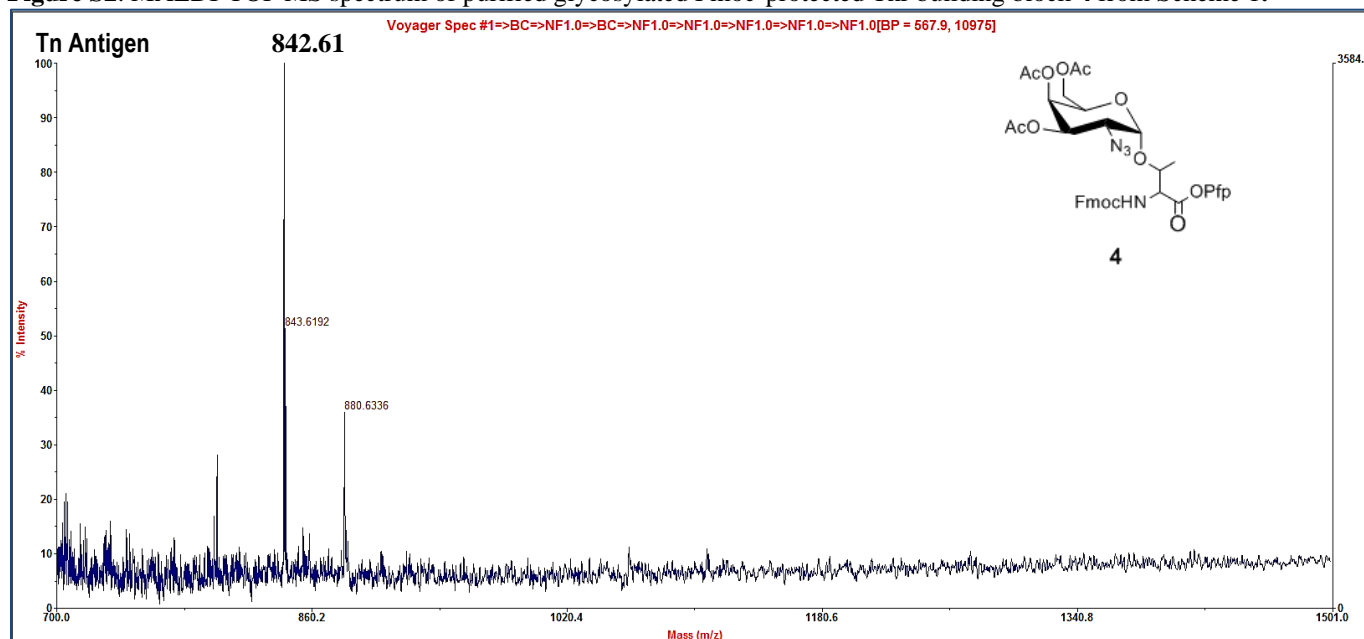

MALDI-TOF MS analysis of purified glycosylated Fmoc-protected Thr building block **4** derived from Scheme 1. Thr-Azide:  $[M + Na]^+ = 842.61$  Da (expected, 843.66 Da).

**Figure S3.**  $^1\text{H}$  NMR spectrum of purified glycosylated Fmoc-protected Thr building block **4** from Scheme 1.

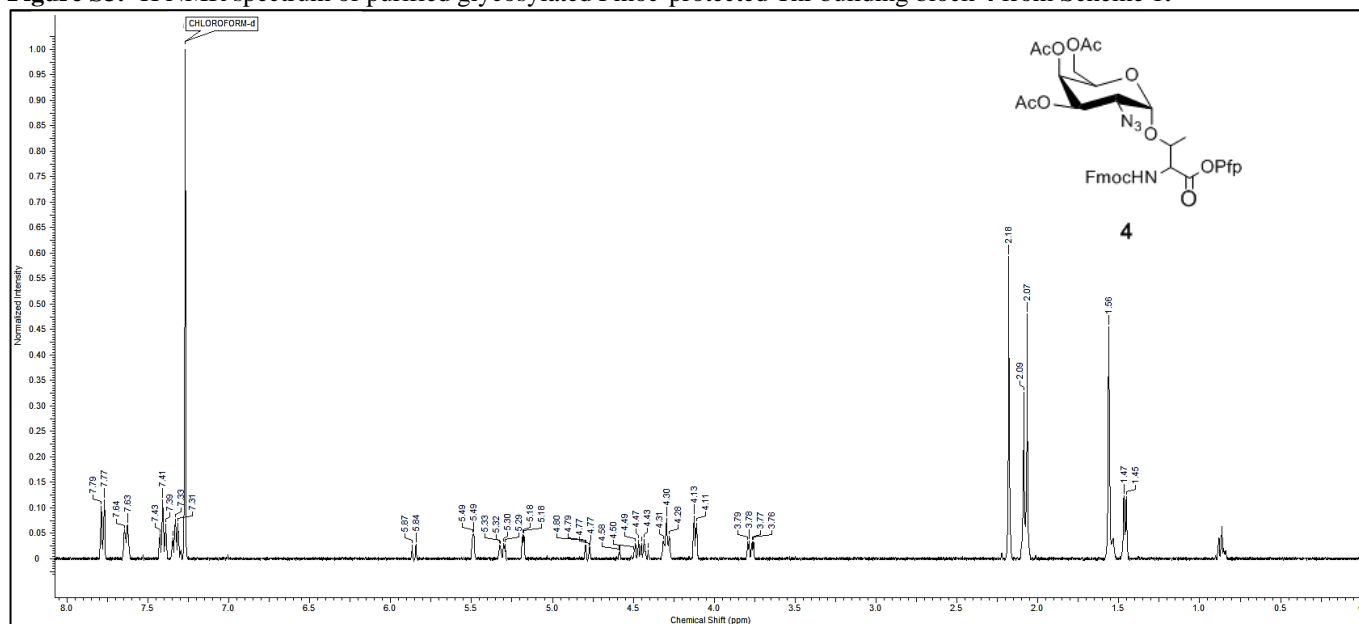

$^1\text{H}$  NMR (400 MHz,  $\text{CDCl}_3$ ):  $\delta$  [ppm] = 7.78-7.76 (d,  $J=7.4$  Hz, Ar-H Fmoc, 2H), 7.63-7.62 (d,  $J=6.5$  Hz, Ar-H Fmoc, 2H), 7.42-7.38 (m, Ar-H Fmoc, 2H), 7.34-7.30 (m, Ar-H Fmoc, 2H), 5.87-5.84 (d,  $J=9.0$  Hz, HN-Thr, 1H), 5.49 (d,  $J=3.0$  Hz, Gal-H<sub>4</sub>, 1H), 5.33-5.29 (dd,  $J=11.0$  Hz, Gal-H<sub>3</sub>, 1H), 5.18 (d,  $J=3.5$  Hz, Gal- $\alpha$ H<sub>1</sub>, 1H), 4.80-4.77 (dd,  $J=10.7$  Hz, Thr- $\alpha$ H, 1H), 4.59 (m, Thr- $\beta$ H, 1H), 4.49-4.43 (m, Fmoc-CH<sub>2</sub>, 2H), 4.31-4.28 (t, Fmoc-CH and Gal-H<sub>5</sub>, 2H), 4.13-4.11 (dd,  $J=6.0, 1.5$  Hz, Gal-H<sub>6a-6b</sub>, 2H), 3.79-3.76 (dd, Gal-H<sub>2</sub>, 1H), 2.17-2.07 (3s, COCH<sub>3</sub>, 9H), 1.47-1.45 (d,  $J=6.0$  Hz, Thr-CH<sub>3</sub>, 3H).

**Figure S4.**  $^{13}\text{C}$  NMR spectrum of purified glycosylated Fmoc-protected Thr building block **4** from Scheme 1.

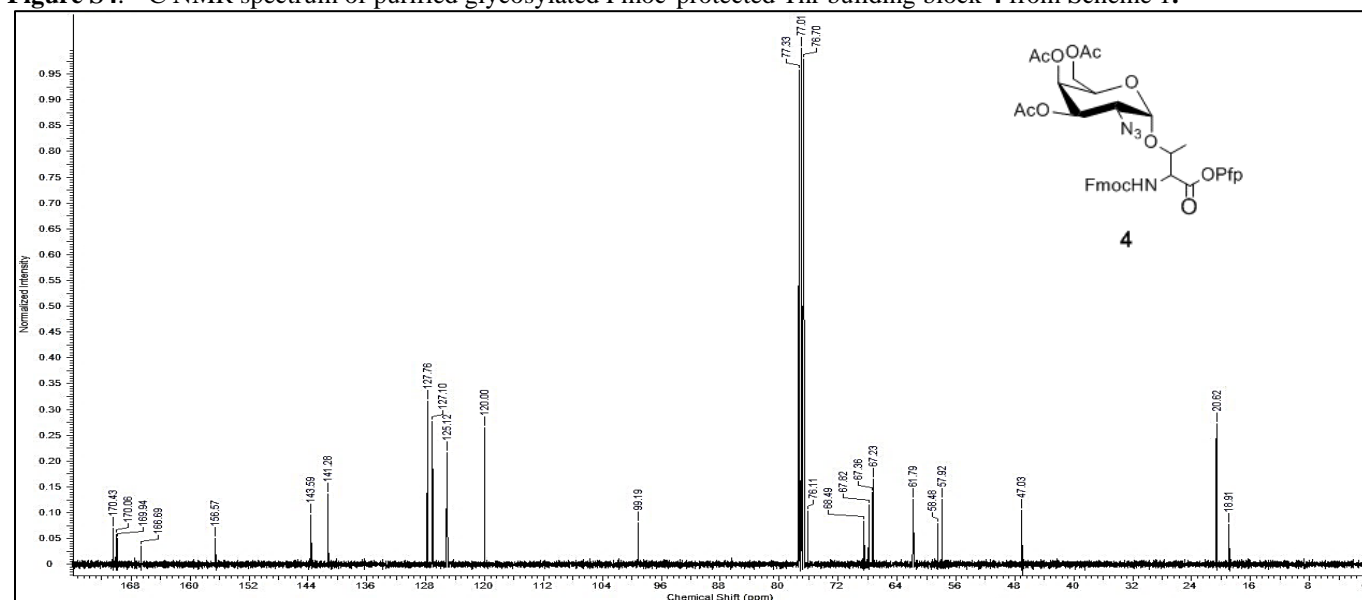

$^{13}\text{C}$  NMR (400 MHz,  $\text{CDCl}_3$ ):  $\delta$  [ppm] = 170.43, 170.06, 169.94, 166.69, 156.57, 143.59, 141.28, 127.76, 127.10, 125.12, 120.00, 99.19 (C<sub>1</sub> GalNAc), 68.49, 67.82, 67.36, 67.23, 61.79, 58.48, 57.92, 47.03, 20.62, 18.91.

## Thr(Tn)

**Figure S5.** RP-HPLC spectrum of purified glycosylated Fmoc-protected Thr building block **5** from Scheme 1.

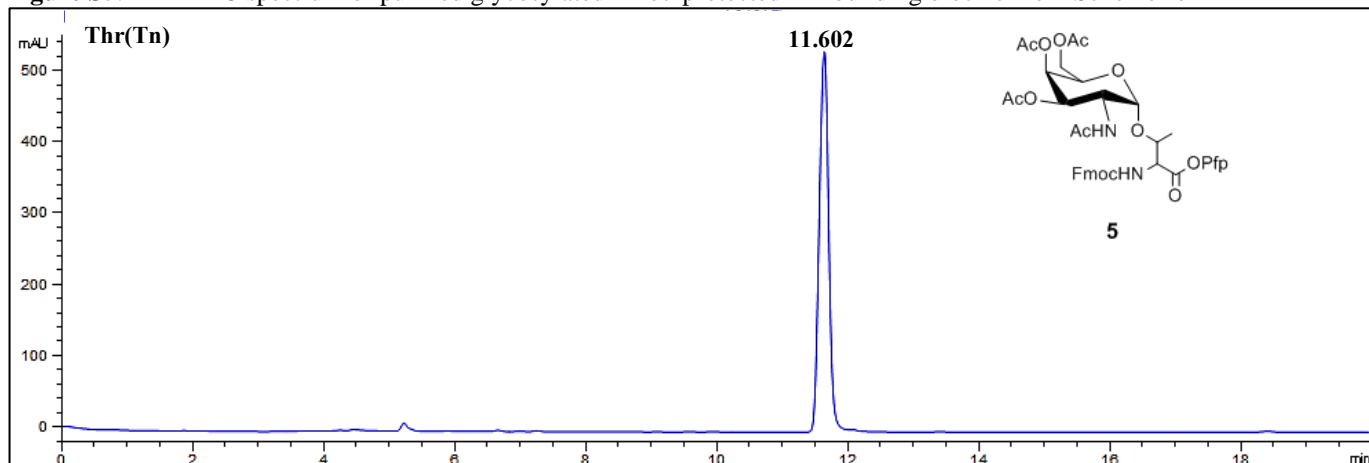

HPLC analysis of purified glycosylated Fmoc-protected Thr building block **5** derived from Scheme 1.

Eluents were 0.1% TFA in water (A) and 0.1% TFA in acetonitrile (B). The elution gradient was 40-100% B in 20 mins with a flow rate of 1.0 mL/min. Detection was at wavelength = 214 nm. Retention time (min) = 11.602.

**Figure S6.** MALDI-TOF MS spectrum of purified glycosylated Fmoc-protected Thr building block **5** from Scheme 1.

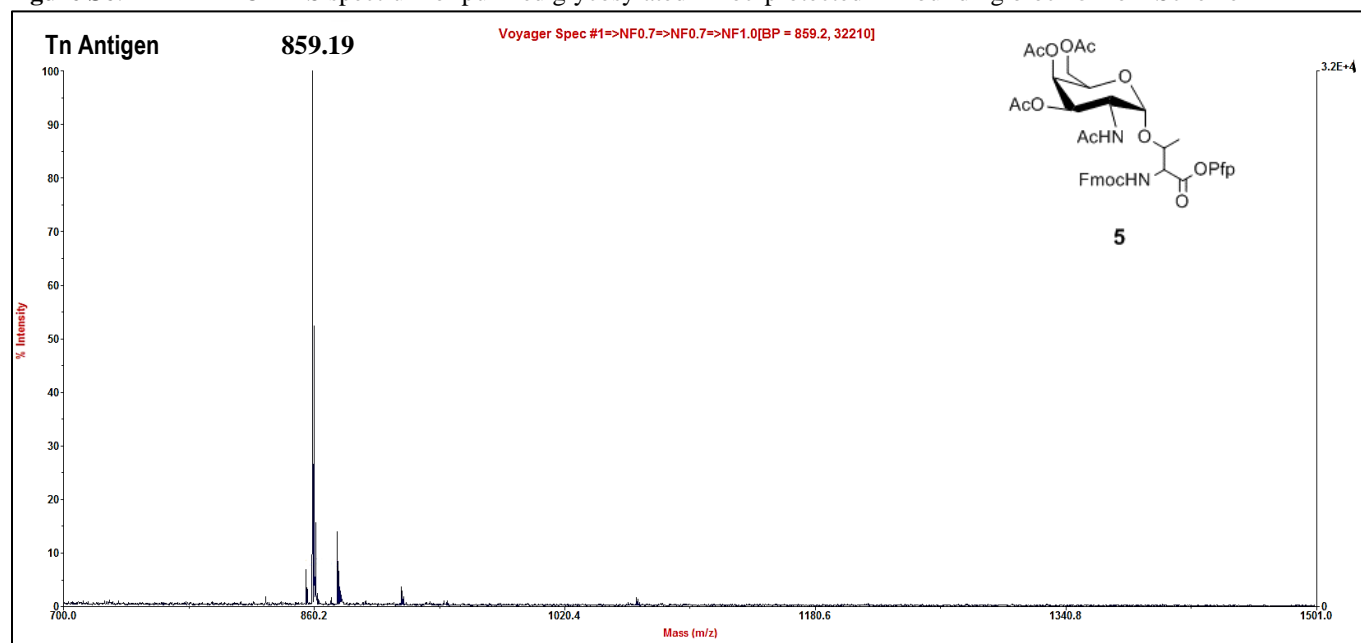

MALDI-TOF MS analysis of purified glycosylated Fmoc-protected Thr building block **5** derived from Scheme 1.

Thr(T<sub>N</sub>): [M + Na]<sup>+</sup> = 859.19 Da (expected, 859.72 Da).

**Figure S7.**  $^1\text{H}$  NMR spectrum of purified glycosylated Fmoc-protected Thr building block **5** from Scheme 1.

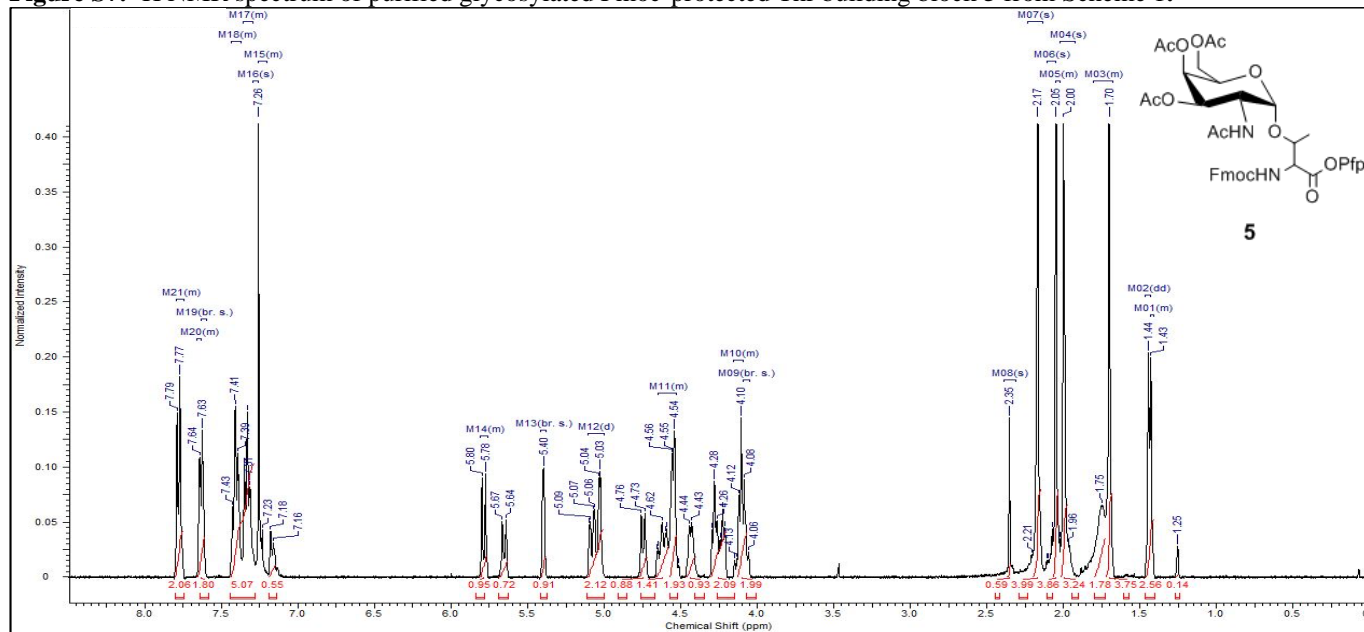

$^1\text{H}$  NMR (400 MHz,  $\text{CDCl}_3$ ):  $\delta$  [ppm] = 7.80-7.77 (d,  $J$  = 7.4 Hz, Ar-H Fmoc, 2H), 7.64-7.63 (d,  $J$  = 7.8 Hz, Ar-H Fmoc, 2H), 7.43-7.39 (m,  $J$  = 7.2 Hz, Ar-H Fmoc, 2H), 7.36-7.32 (m,  $J$  = 7.3 Hz, Ar-H Fmoc, 2H), 7.18-7.16 (m,  $\text{NHCOCH}_3$ , 1H), 5.80-5.78 (d,  $J$  = 9.2 Hz, NH-Thr, 1H), 5.67-5.64 (d,  $J$  = 10.4 Hz, Gal-H<sub>1</sub>, 1H), 5.40 (s, Gal-H<sub>4</sub>, 1H), 5.09-5.03 (m, Gal-H<sub>3</sub>, 1H), 4.76-4.73 (d,  $J$  = 8.2 Hz,  $\alpha\text{CH}$  Thr, 1H), 4.66-4.54 (m, Gal-H<sub>5</sub>, Fmoc CH<sub>2</sub>, and  $\beta\text{CH}$  Thr, 4H), 4.44-4.43 (m, Gal-H<sub>2</sub>, 1H), 4.31-4.22 (m, Fmoc-CH, 1H), 4.13-4.06 (m, Gal-H<sub>6a-6b</sub>, 2H), 2.17 (s,  $\text{COCH}_3$ , 3H), 2.05 (s,  $\text{COCH}_3$ , 3H), 2.00 (s,  $\text{COCH}_3$ , 3H), 1.70 (s,  $\text{NHCOCH}_3$ , 3H), 1.44-1.43 (d, Thr-CH<sub>3</sub>, 3H).

**Figure S8.**  $^{13}\text{C}$  NMR spectrum of purified glycosylated Fmoc-protected Thr building block **5** from Scheme 1.

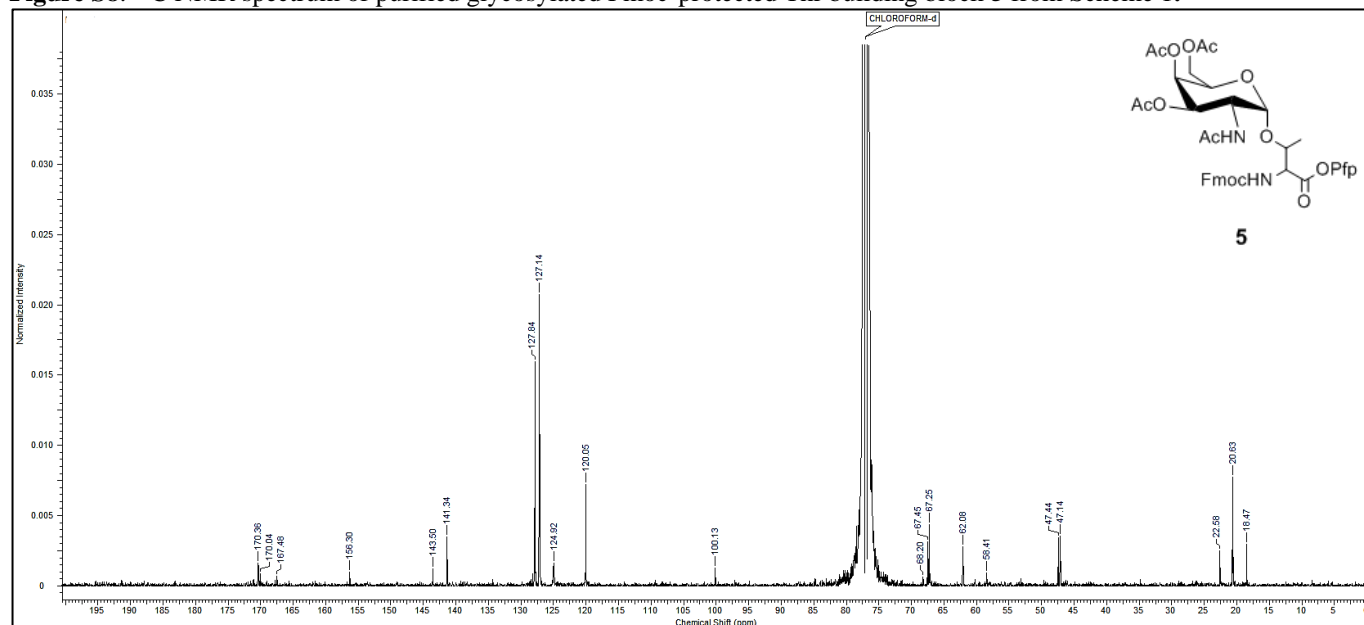

$^{13}\text{C}$  NMR (400 MHz,  $\text{CDCl}_3$ ):  $\delta$  [ppm] = 170.36, 170.04, 167.48, 156.30, 143.50, 141.34, 127.84, 127.14, 124.92, 120.05, 100.13 (C<sub>1</sub> GalNAc), 68.20, 67.45, 67.25, 62.08, 58.41, 47.44, 47.14, 22.58, 20.64, 20.63, 20.62, 18.47.

## Peptide Synthesis

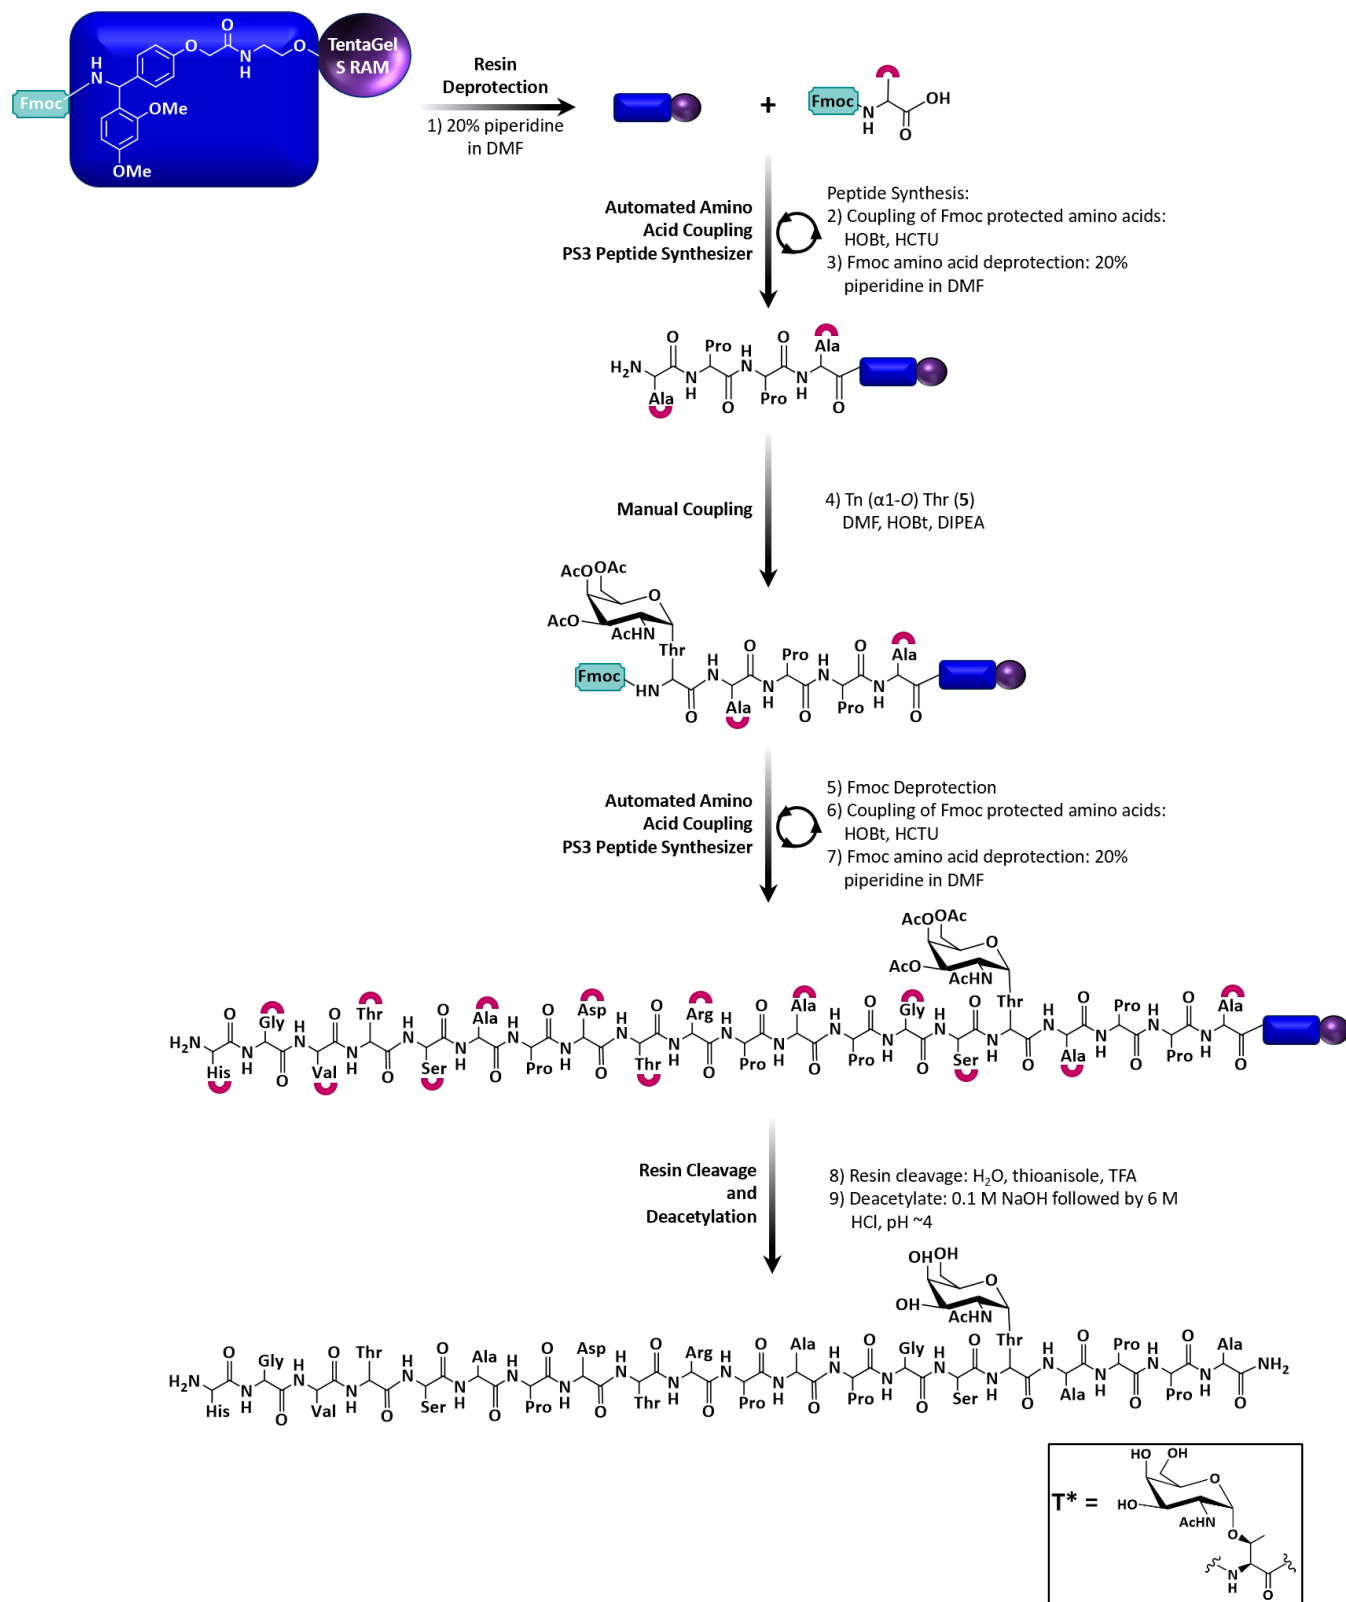

**Figure S9.** General synthetic scheme for glycopeptides (specifically peptide 7, MUC1: HGVT\* $\text{Tn}$ SAPDTRPAGSTAPPA).

## MUC1

**Figure S10.** RP-HPLC spectrum of purified MUC1 peptide (6).

MUC1: HGVTSAPDTRPAPGSTAPPA

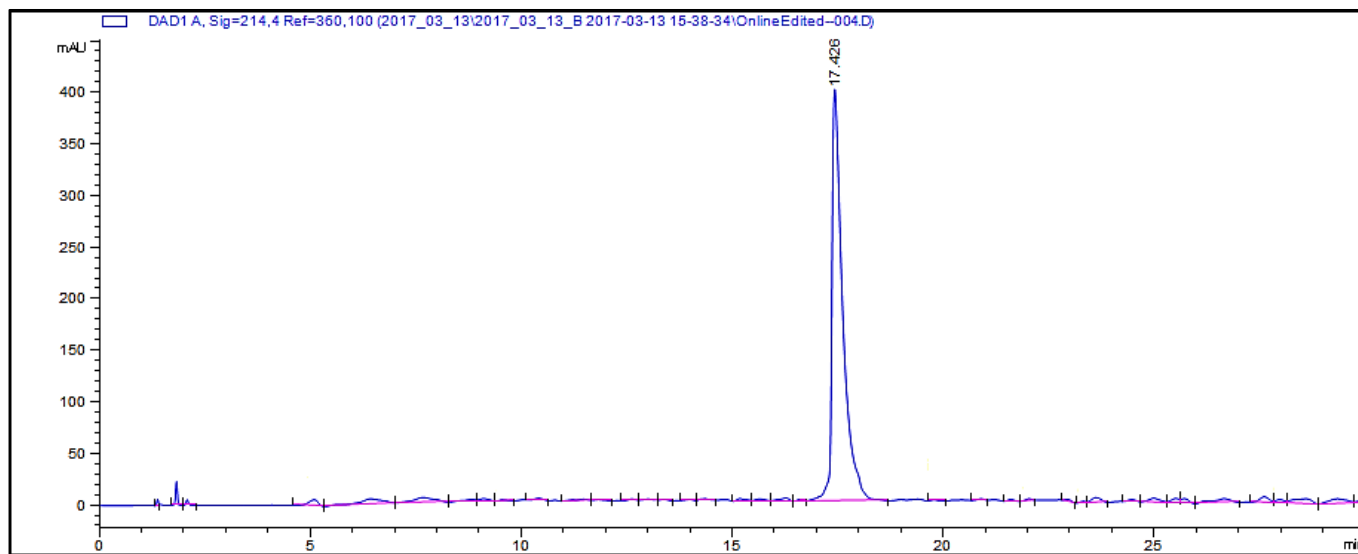

HPLC analysis of purified MUC1 peptide (6).

Eluents were 0.1% TFA in water (A) and 0.1% TFA in acetonitrile (B). The elution gradient was 0-30% B in 30 mins with a flow rate of 1.0 mL/min. Detection was at wavelength = 214 nm. Retention time (min) = 17.42.

**Figure S11.** MALDI-TOF MS spectrum of purified MUC1 peptide (6).

MUC1: HGVTSAPDTRPAPGSTAPPA

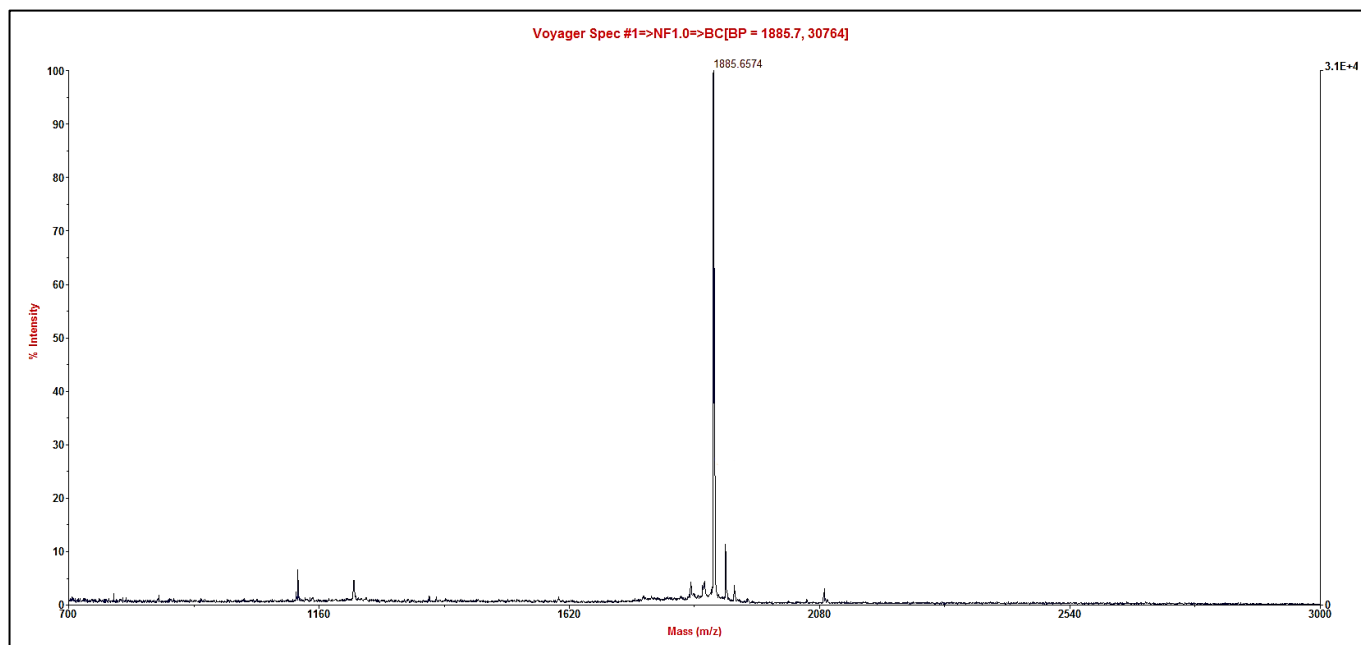

MALDI-TOF MS analysis of purified MUC1 peptide (6).

$[M + H]^+ = 1885.65$  Da (expected, 1884.93 Da).



## MUC1-Thr4

**Figure S12.** RP-HPLC spectrum of purified MUC1-Thr4 peptide (7).

MUC1: HGVT\*SAPDTRPAPGSTAPPA

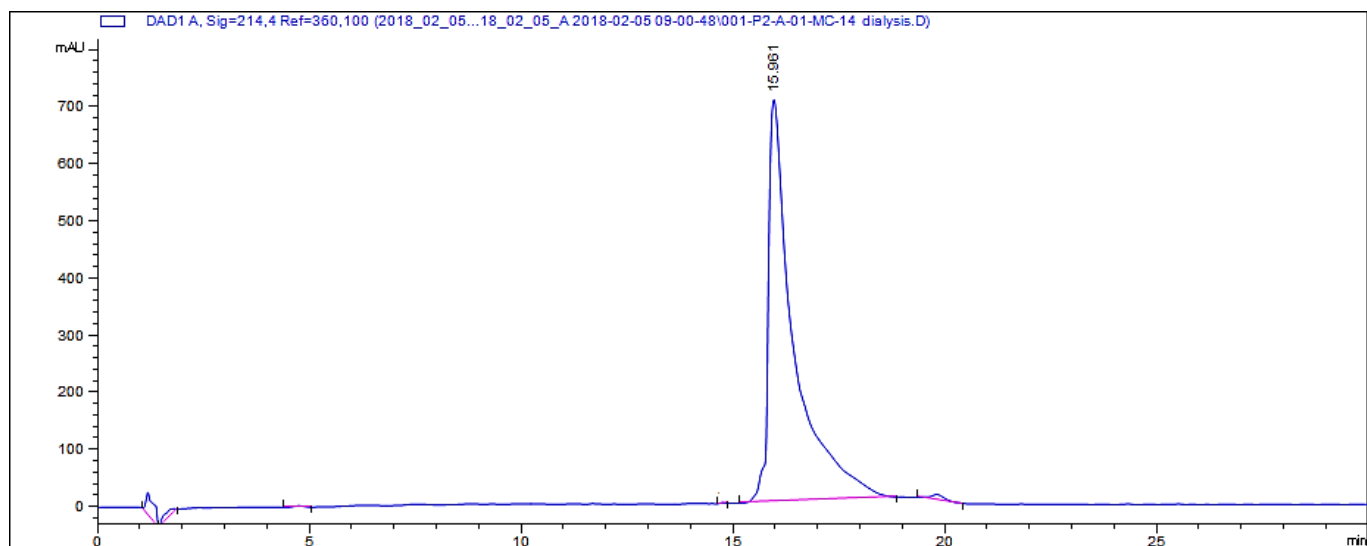

HPLC analysis of purified glycosylated MUC1-Thr4 peptide (7).

Eluents were 0.1% TFA in water (A) and 0.1% TFA in acetonitrile (B). The elution gradient was 0-30% B in 30 mins with a flow rate of 1.0 mL/min. Detection was at wavelength = 214 nm. Retention time (min) = 15.96.

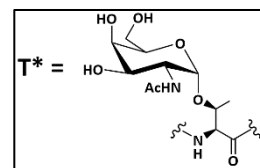

**Figure S13.** MALDI-TOF MS spectrum of purified MUC1-Thr4 peptide (7).

MUC1: HGVT\*SAPDTRPAPGSTAPPA

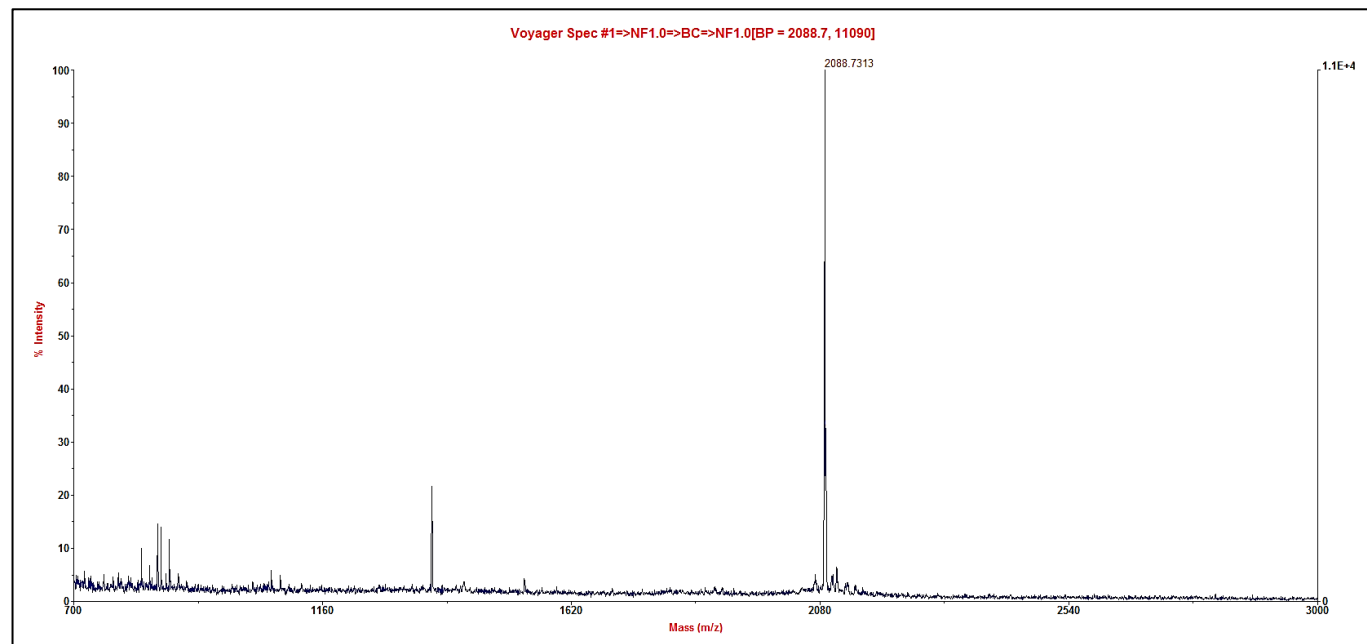

MALDI-TOF MS analysis of purified glycosylated MUC1-Thr4 peptide (7).

$[M + H]^+ = 2088.73$  Da (expected, 2089.25 Da).

## MUC1-Thr9

**Figure S14.** RP-HPLC spectrum of purified MUC1-Thr9 peptide (**8**).

MUC1: HGVTSAPDT\*RPAPGSTAPPA

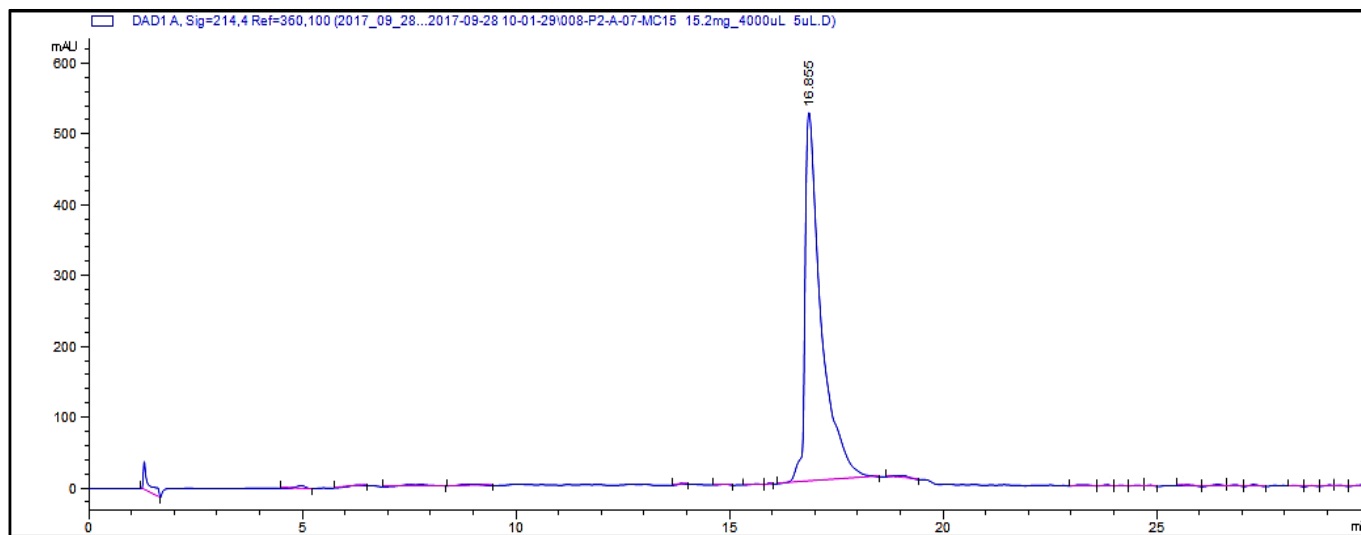

HPLC analysis of purified glycosylated MUC1-Thr9 peptide (**8**).

Eluents were 0.1% TFA in water (A) and 0.1% TFA in acetonitrile (B). The elution gradient was 0-30% B in 30 mins with a flow rate of 1.0 mL/min. Detection was at wavelength = 214 nm. Retention time (min) = 16.85.

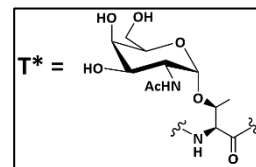

**Figure S15.** MALDI-TOF MS spectrum of purified MUC1-Thr9 peptide (**8**).

MUC1: HGVTSAPDT\*RPAPGSTAPPA

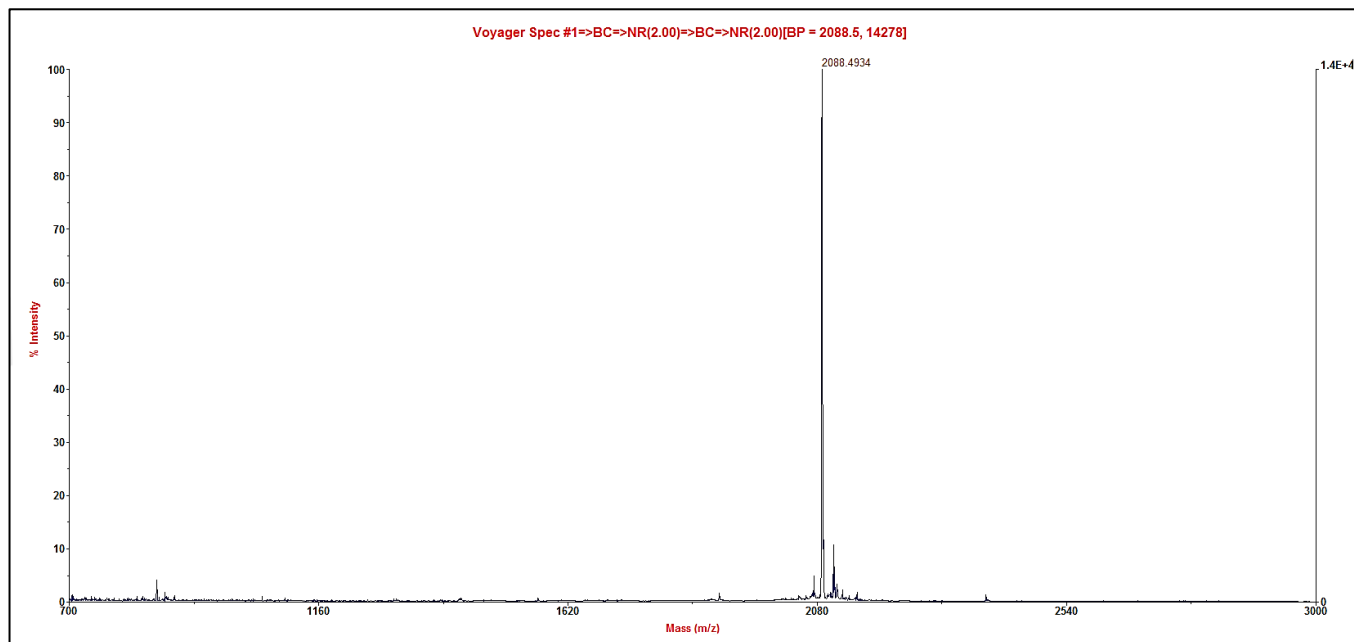

MALDI-TOF MS analysis of purified glycosylated MUC1-Thr9 peptide (**8**).

$[M + H]^+ = 2088.49$  Da (expected, 2089.25 Da).

## MUC1-Thr16

**Figure S16.** RP-HPLC spectrum of purified MUC1-Thr16 peptide (9).  
MUC1: HGVTSAPDTRPAPGST\*APPA

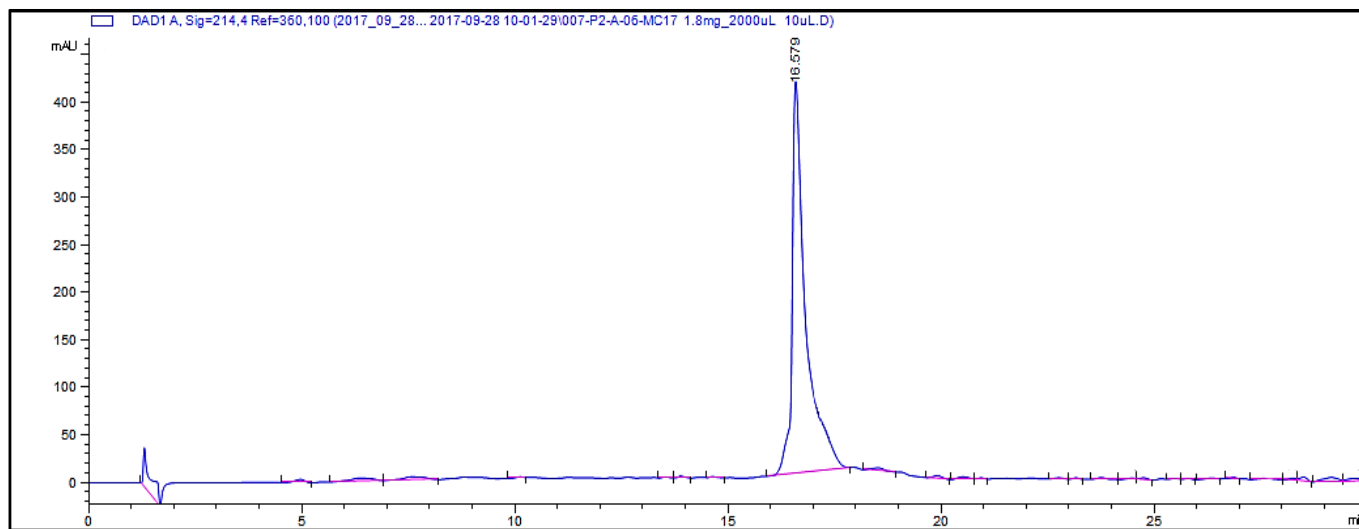

HPLC analysis of purified glycosylated MUC1-Thr16 peptide (9).

Eluents were 0.1% TFA in water (A) and 0.1% TFA in acetonitrile (B). The elution gradient was 0-30% B in 30 mins with a flow rate of 1.0 mL/min. Detection was at wavelength = 214 nm. Retention time (min) = 16.57.

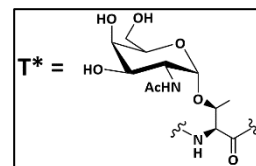

**Figure S17.** MALDI-TOF MS spectrum of purified MUC1-Thr16 peptide (9).  
MUC1: HGVTSAPDTRPAPGST\*APPA

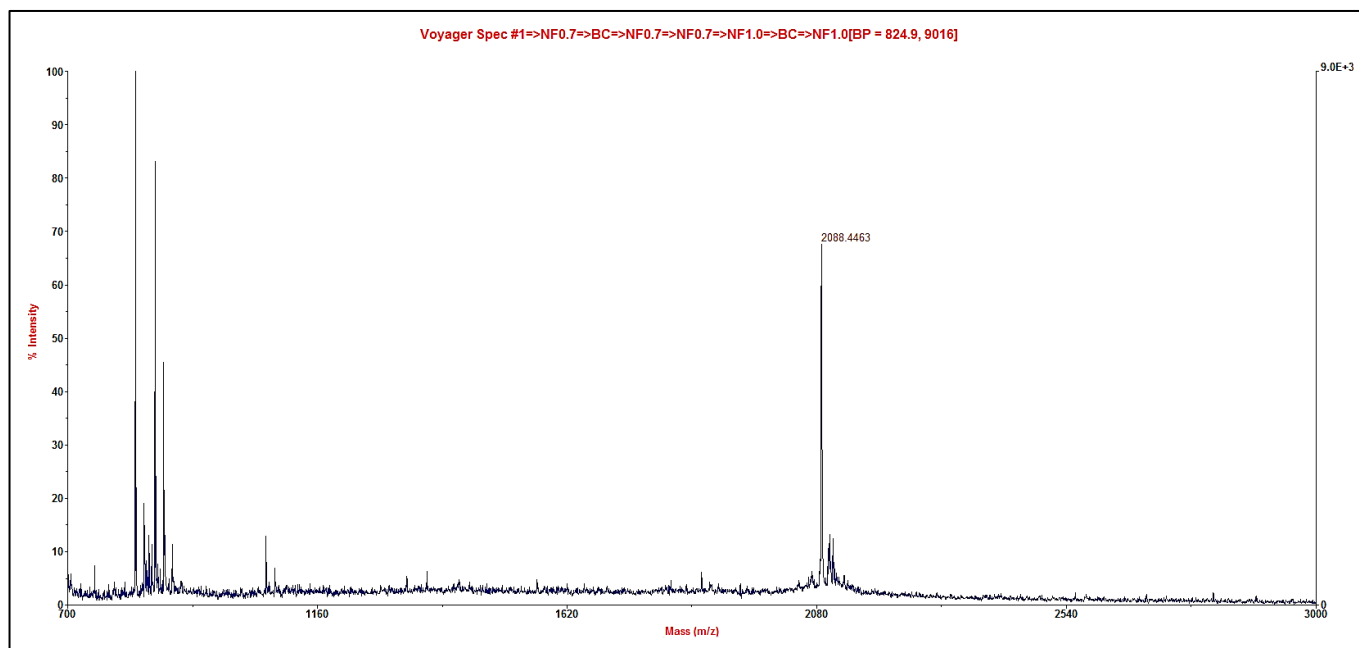

MALDI-TOF MS analysis of purified glycosylated MUC1-Thr16 peptide (9).  
[M + H]<sup>+</sup> = 2088.44 Da (expected, 2089.25 Da).

## MUC1-Thr9,16

**Figure S18.** RP-HPLC spectrum of purified MUC1-Thr9,16 peptide (**10**).

MUC1: HGVTSAPDT\*RPAPGST\*APPA

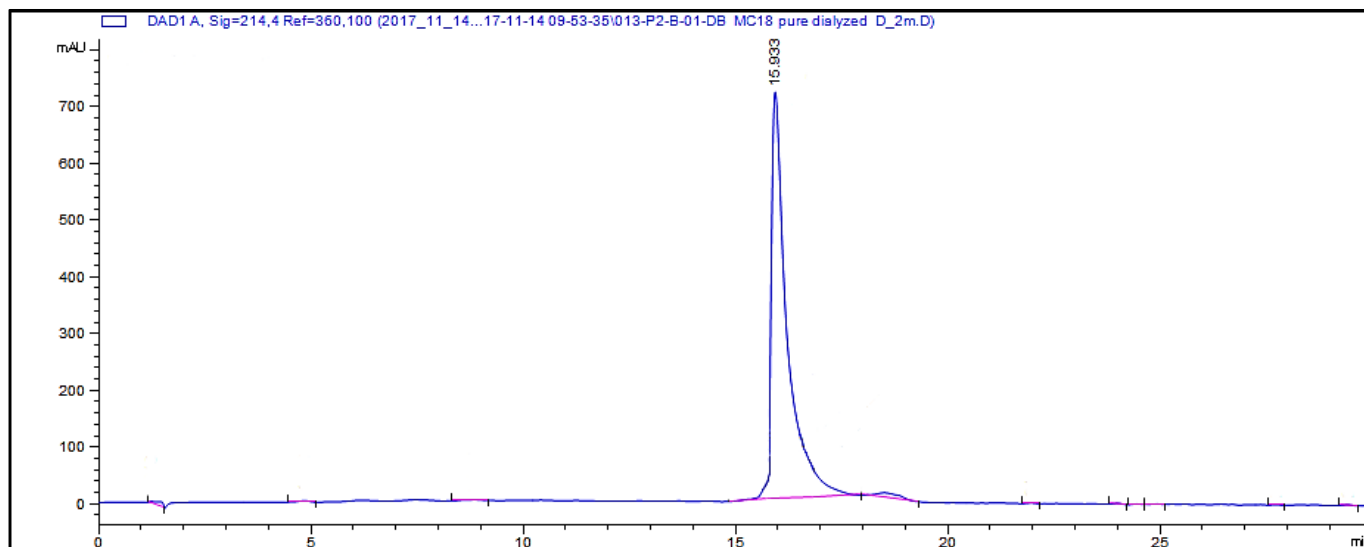

HPLC analysis of purified glycosylated MUC1-Thr9,16 peptide (**10**).

Eluents were 0.1% TFA in water (A) and 0.1% TFA in acetonitrile (B). The elution gradient was 0-30% B in 30 mins with a flow rate of 1.0 mL/min. Detection was at wavelength = 214 nm. Retention time (min) = 15.93.

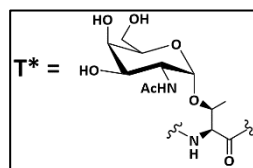

**Figure S19.** MALDI-TOF MS spectrum of purified MUC1-Thr9,16 peptide (**10**).

MUC1: HGVTSAPDT\*RPAPGST\*APPA

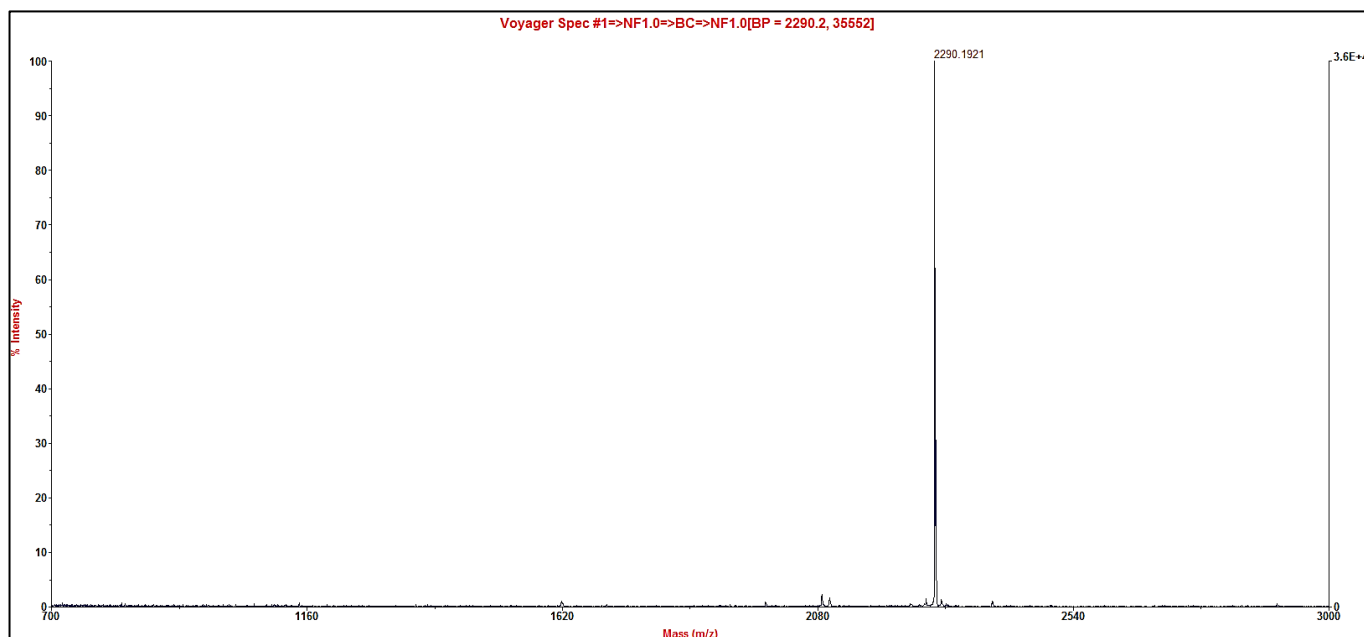

MALDI-TOF MS analysis of purified glycosylated MUC1-Thr9,16 peptide (**10**).

$[M + H]^+ = 2290.19$  Da (expected, 2292.45 Da).

## MUC1-Thr4,16

**Figure S20.** RP-HPLC spectrum of purified MUC1-Thr4,16 peptide (**11**).

MUC1: HGVT\*SAPDTRPAGST\*APPA

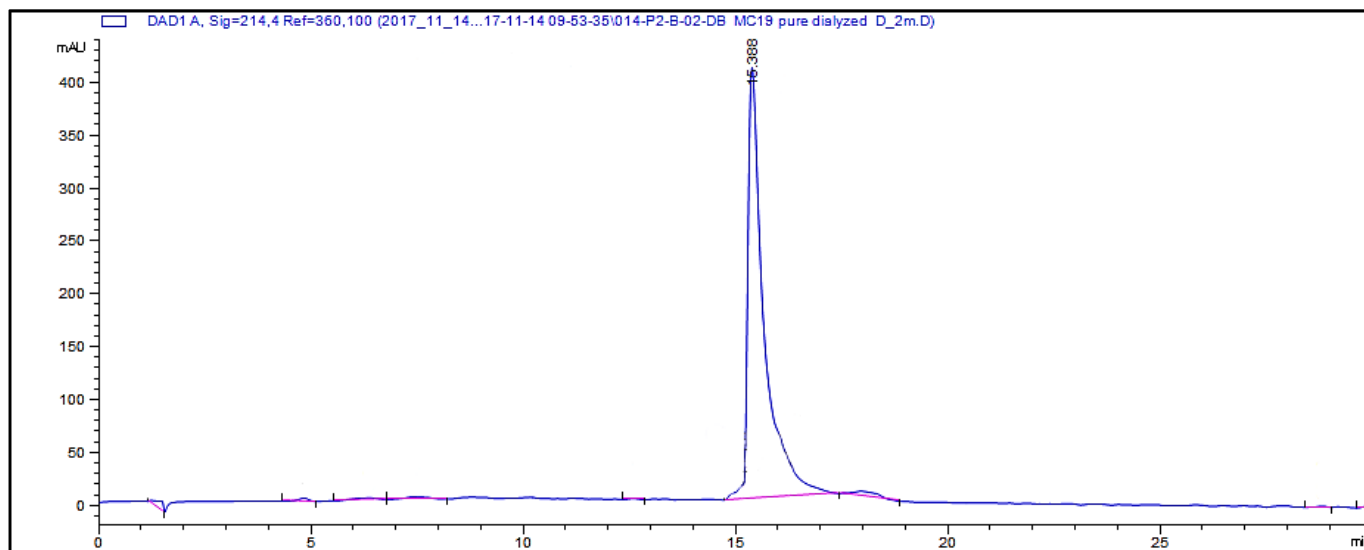

HPLC analysis of purified glycosylated MUC1-Thr4,16 peptide (**11**). Eluents were 0.1% TFA in water (A) and 0.1% TFA in acetonitrile (B). The elution gradient was 0-30% B in 30 mins with a flow rate of 1.0 mL/min. Detection was at wavelength = 214 nm. Retention time (min) = 15.38.

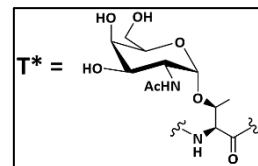

**Figure S21.** MALDI-TOF MS spectrum of purified MUC1-Thr4,16 peptide (**11**).

MUC1: HGVT\*SAPDTRPAGST\*APPA

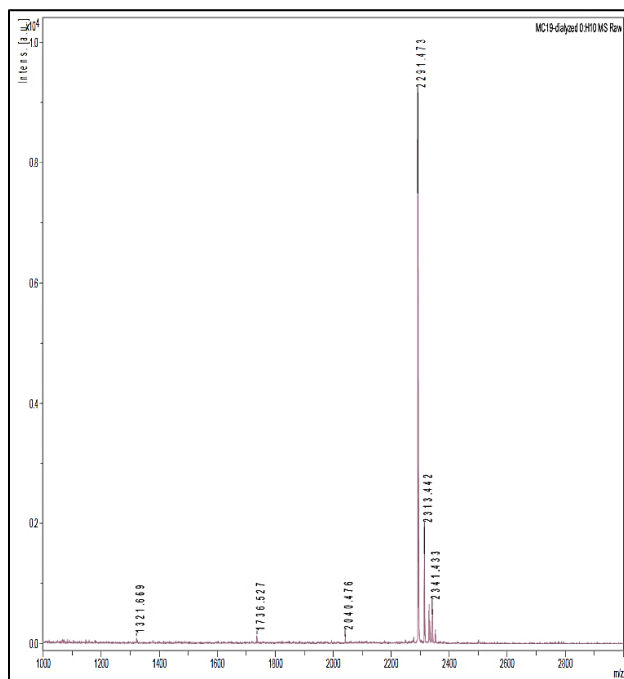

MALDI-TOF MS analysis of purified glycosylated MUC1-Thr4,16 peptide (**11**) was performed with a MicroFlex LT system (Bruker).  $[M + H]^+ = 2291.47$  Da (expected, 2292.45 Da).

## MUC1-Thr4,9

**Figure S22.** RP-HPLC spectrum of purified MUC1-Thr4,9 peptide (**12**).

MUC1: HGVT\*SAPDT\*RPAPGSTAPPA

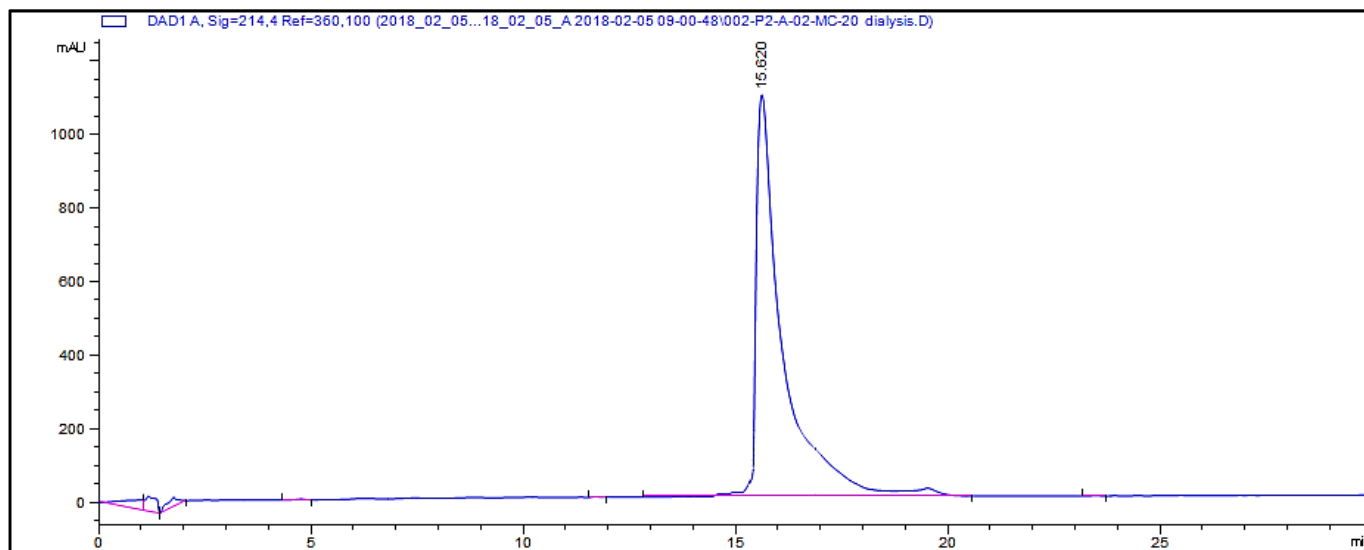

HPLC analysis of purified glycosylated MUC1-Thr4,9 peptide (**12**).

Eluents were 0.1% TFA in water (A) and 0.1% TFA in acetonitrile (B). The elution gradient was 0-30% B in 30 mins with a flow rate of 1.0 mL/min. Detection was at wavelength = 214 nm. Retention time (min) = 15.62.

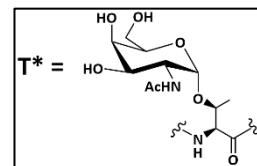

**Figure S23.** MALDI-TOF MS spectrum of purified MUC1-Thr4,9 peptide (**12**).

MUC1: HGVT\*SAPDT\*RPAPGSTAPPA

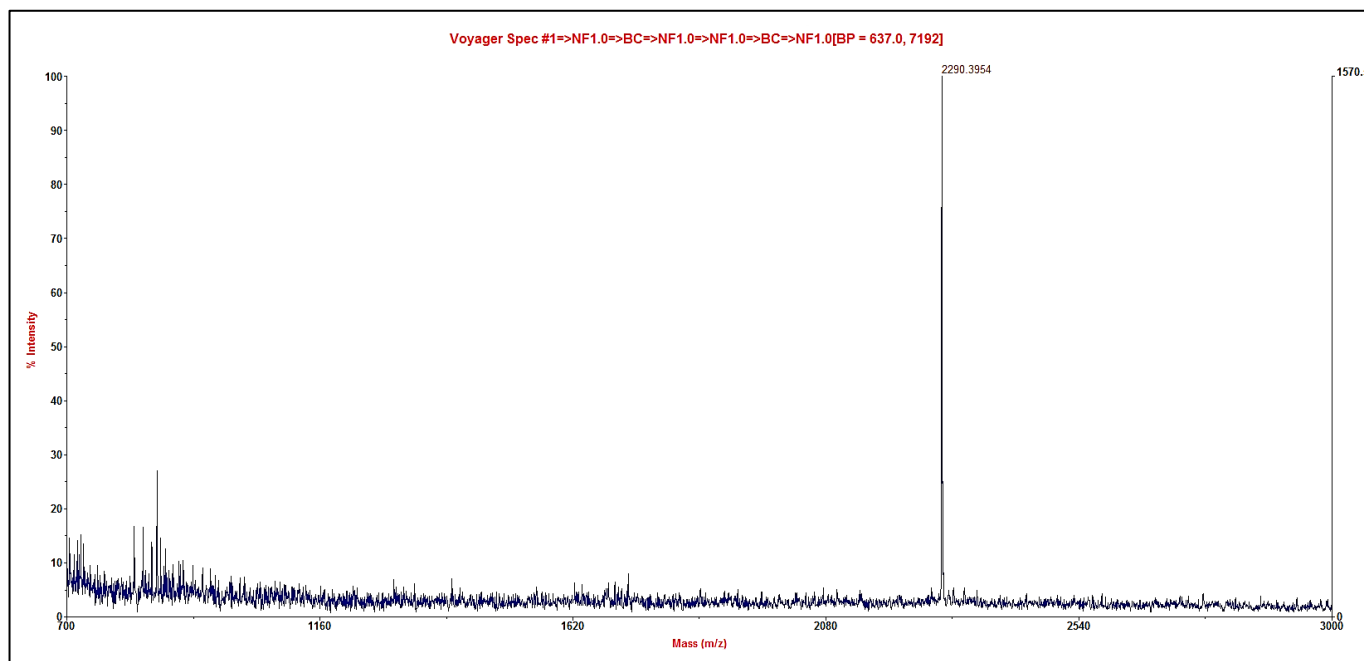

MALDI-TOF MS analysis of purified glycosylated MUC1-Thr4,9 peptide (**12**).

[M + H]<sup>+</sup> = 2290.39 Da (expected, 2292.45 Da).

## MUC1-Thr4,9,16

**Figure S24.** RP-HPLC spectrum of purified MUC1-Thr4,9,16 peptide (**13**).

MUC1: HGVT\*SAPDT\*RPAPGST\*APPA

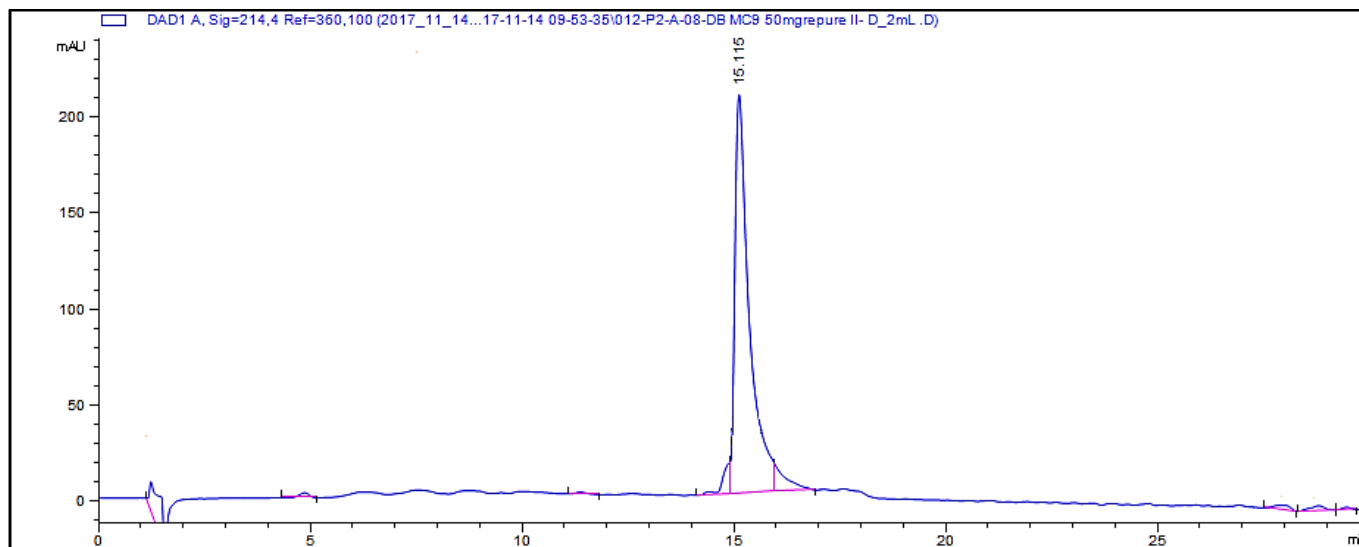

HPLC analysis of purified glycosylated MUC1-Thr4,9,16 peptide (**13**).

Eluents were 0.1% TFA in water (A) and 0.1% TFA in acetonitrile (B). The elution gradient was 0-30% B in 30 mins with a flow rate of 1.0 mL/min. Detection was at wavelength = 214 nm. Retention time (min) = 15.11.

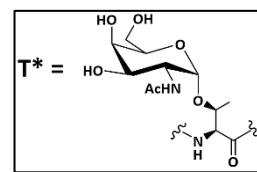

**Figure S25.** MALDI-TOF MS spectrum of purified MUC1-Thr4,9,16 peptide (**13**).

MUC1: HGVT\*SAPDT\*RPAPGST\*APPA

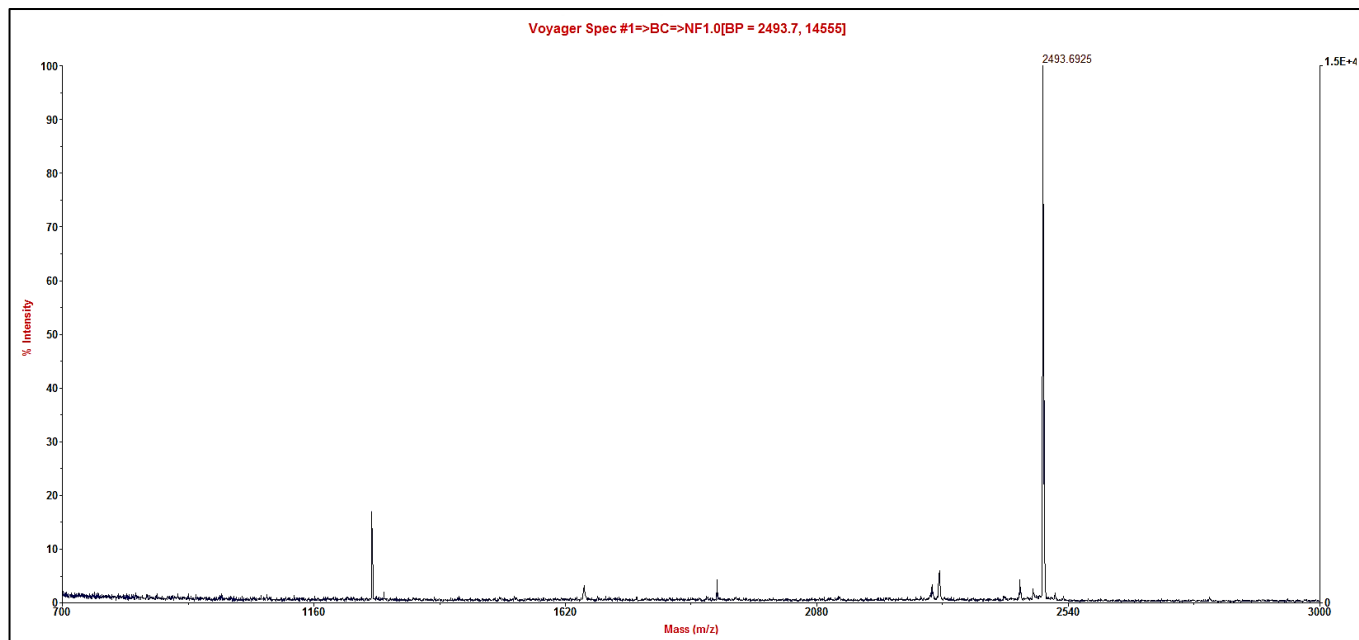

MALDI-TOF MS analysis of purified glycosylated MUC1-Thr4,9,16 peptide (**13**).

$[M + H]^+ = 2493.69$  Da (expected, 2495.28 Da).

## Circular Dichroism

**Figure S26.** Circular dichroism spectra of MUC1 (glyco)peptides in buffered (A) H<sub>2</sub>O and (B) D<sub>2</sub>O.  $\Delta[\theta]_{\max}$  value represents each peptide molar ellipticity normalized against MUC1  $[\theta]_{\max}$  in deg cm<sup>2</sup> dmol<sup>-1</sup>.

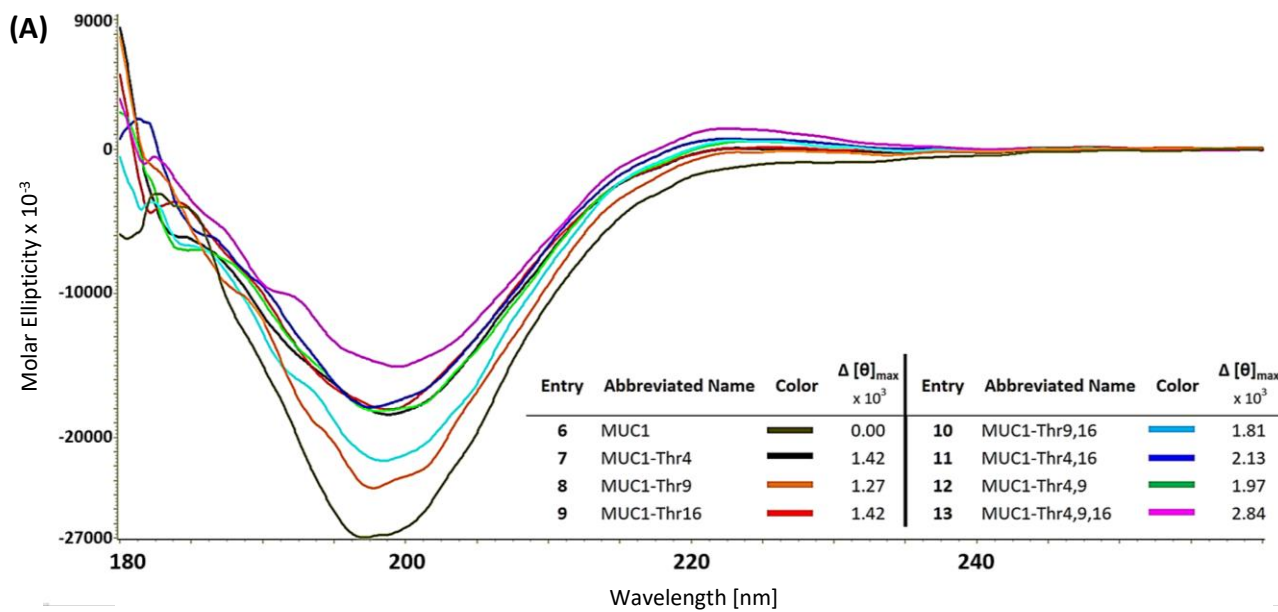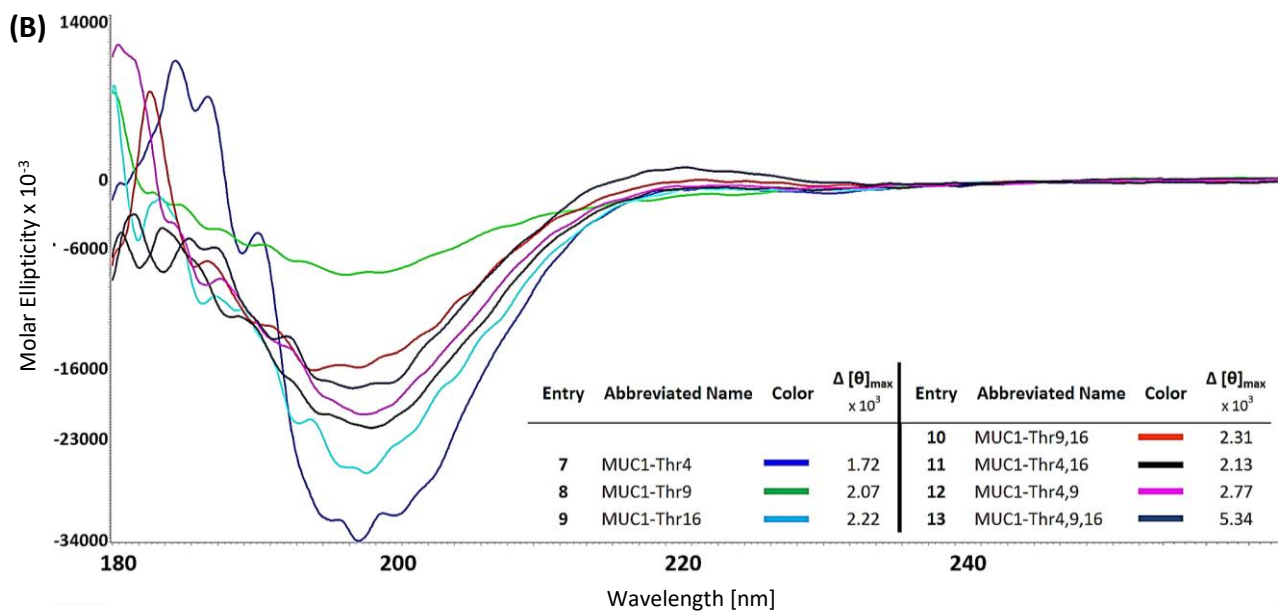



## Macrophage Galactose Lectin

Figure S27A. Molecular mass determination of hMGL by MALDI-TOF MS.

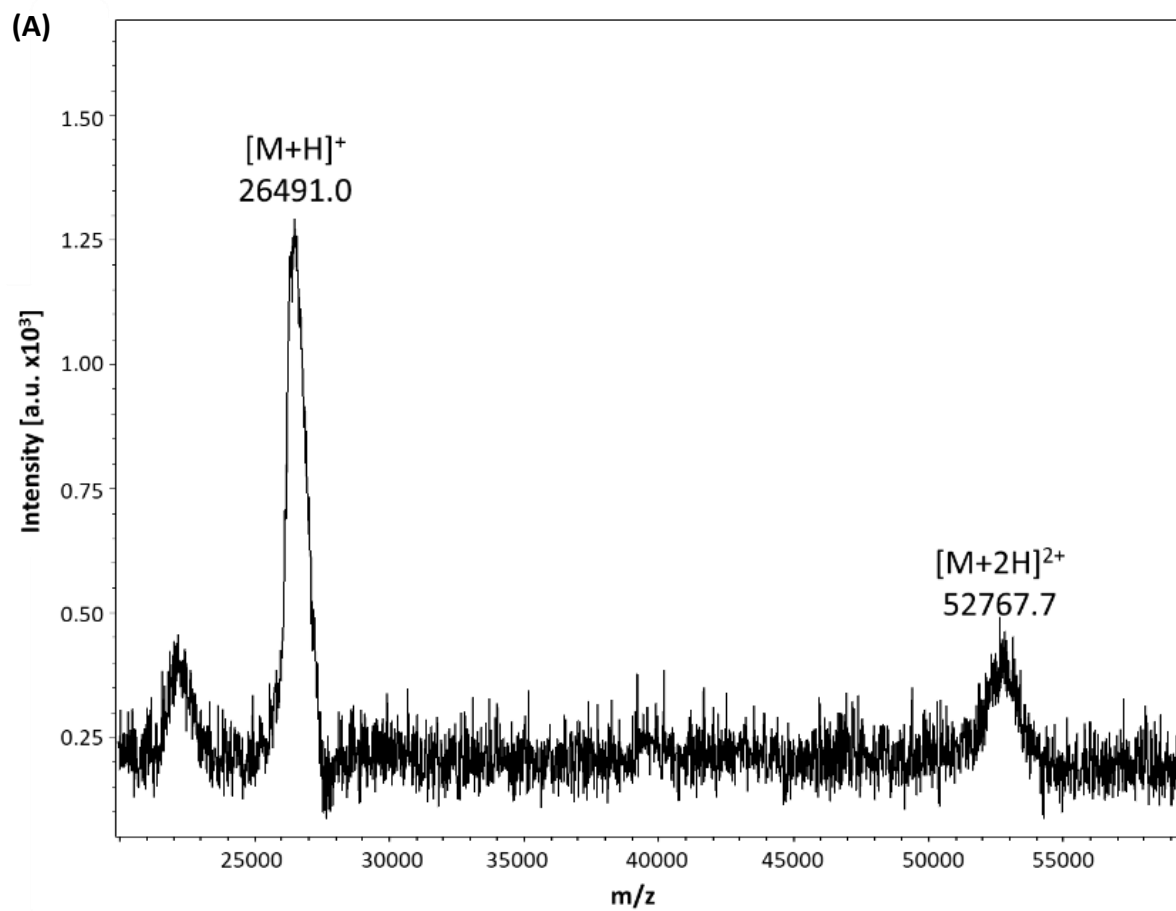

**Figure S27B.** Tryptic peptide mass fingerprinting of hMGL by MALDI-TOF MS.

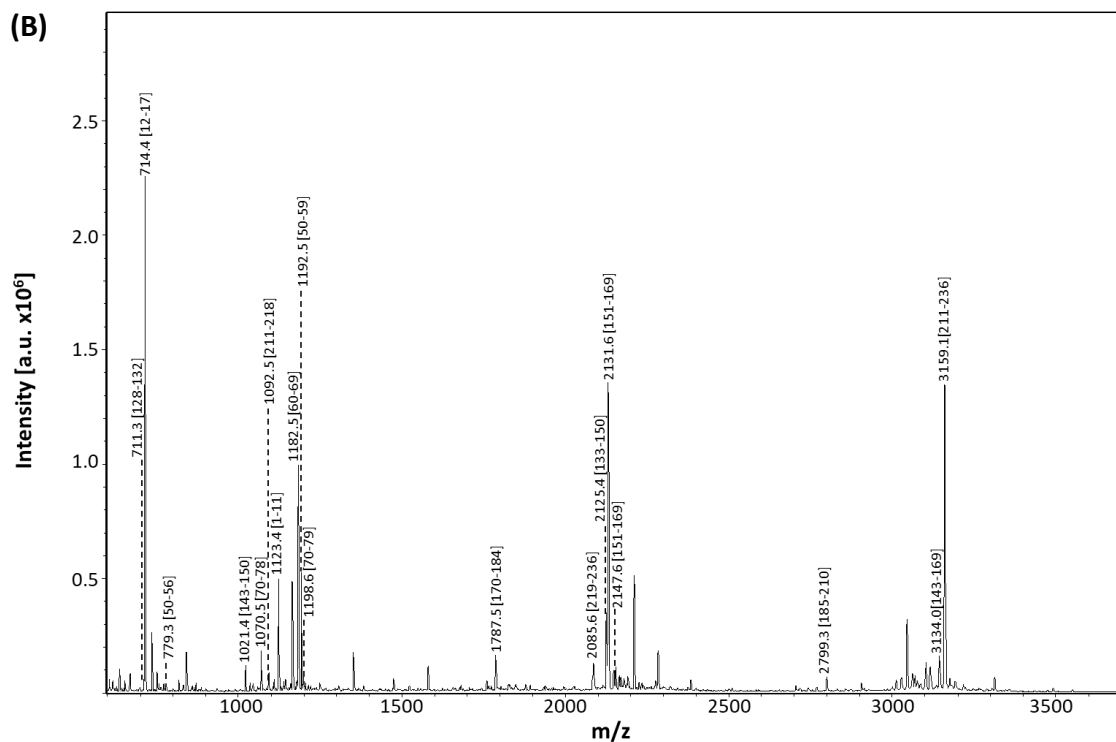

List of detected peptides with their calculated (calc) and experimentally measured (exp) mass values.

| Sequence                                | [MH] <sup>+</sup> (mono) calc | [MH] <sup>+</sup> (mono) exp |
|-----------------------------------------|-------------------------------|------------------------------|
| YCQLK <sup>1</sup>                      | 711.3                         | 711.3                        |
| ILVTLR                                  | 714.5                         | 714.4                        |
| AEVEGFK                                 | 779.4                         | 779.3                        |
| EEQNFVQK                                | 1021.5                        | 1021.4                       |
| VQQLVQDLK                               | 1070.6                        | 1070.5                       |
| WNDDVCQR <sup>1</sup>                   | 1092.5                        | 1092.5                       |
| ASMTGGQQMGR                             | 1123.5                        | 1123.4                       |
| ASMTGGQQMGR <sup>2,2</sup>              | 1155.5                        | 1155.4                       |
| QAVHSEMLLR                              | 1183.6                        | 1183.5                       |
| AEVEGFKQER                              | 1192.6                        | 1192.5                       |
| VQQLVQDLKK                              | 1198.7                        | 1198.6                       |
| WVDGTDYATGFQNWK                         | 1787.8                        | 1787.5                       |
| PYHWVCEAGLQTSQESH <sup>1</sup>          | 2085.9                        | 2085.6                       |
| NAHLVINSREEQNFVQK                       | 2125.1                        | 2125.4                       |
| YLGSAYTWGLSDPEGAWK                      | 2132.0                        | 2131.6                       |
| YLGSAYTWGLSDPEGAWK <sup>2</sup>         | 2148.0                        | 2147.6                       |
| PGQPDDWQGHGLGGGEDCAHFHPDGR <sup>1</sup> | 2799.2                        | 2799.3                       |
| EEQNFVQKYLGSAYTWGLSDPEGAWK              | 3134.5                        | 3134.0                       |
| WNDDVCQRPYHWVCEAGLQTSQESH <sup>1</sup>  | 3159.3                        | 3159.1                       |

Sequence coverage (66.1%)

ASMTGGQQMGRILVTLRTDFSNFTSNTVAEIQALTSQGSLEETIASLKAEVEGFKQERQAVHSEMLLRVQQLVQDLK  
 KLTCQVATLNNNGEEASTEGTCCPVNWVEHQDSCYWFSHSGMSWAEAEKYCQLKNAHLVINSREEQNFVQKYLGS  
 SAYTWGLSDPEGAWKWVDGTDYATGFQNWKPGQPDDWQGHGLGGGEDCAHFHPDGRWNDDVCQRPYHWVCE  
 AGLQTSQESH

Figure S27C. Chymotryptic peptide mass fingerprinting of hMGL by MALDI-TOF MS.

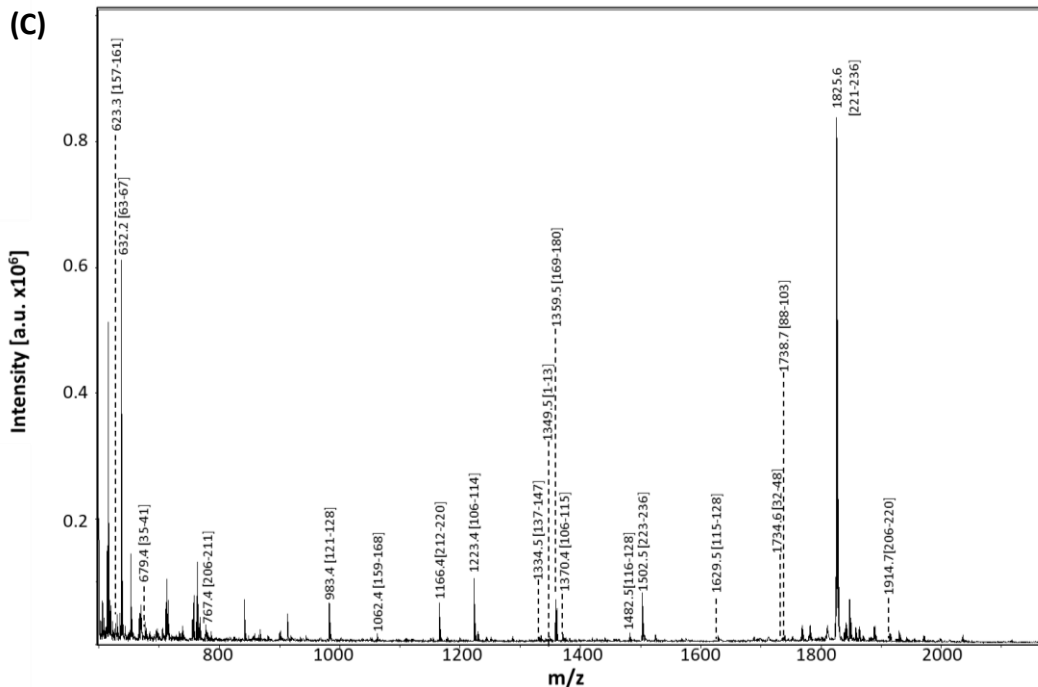

List of detected peptides with their calculated (calc) and experimentally measured (exp) mass values.

| Sequence                      | [MH] <sup>+</sup> (mono) calc | [MH] <sup>+</sup> (mono) exp |
|-------------------------------|-------------------------------|------------------------------|
| TWMGL <sup>2</sup>            | 623.3                         | 623.3                        |
| HSEML <sup>2</sup>            | 632.3                         | 632.2                        |
| TSQGSSL                       | 679.3                         | 679.4                        |
| HPDGRW                        | 767.4                         | 767.4                        |
| SWAEAEKY                      | 983.4                         | 983.4                        |
| MGLSDPEGAW                    | 1062.5                        | 1062.4                       |
| NDDVCQRPY <sup>1</sup>        | 1166.5                        | 1166.4                       |
| VEHQDSCYW <sup>2</sup>        | 1223.5                        | 1223.4                       |
| VVINSREEQNF                   | 1334.6                        | 1334.5                       |
| ASMTGGQMGRIL                  | 1349.7                        | 1349.5                       |
| KWVDGTDYATGF                  | 1359.6                        | 1359.5                       |
| VEHQDSCYWF <sup>1</sup>       | 1370.5                        | 1370.4                       |
| SHSGMSWAEAEKY                 | 1482.6                        | 1482.5                       |
| VCEAGLGQTSQESH <sup>1</sup>   | 1502.7                        | 1502.5                       |
| FSHSGMSWAEAEKY                | 1629.7                        | 1629.5                       |
| QALTSQGSSLEETIASL             | 1734.9                        | 1734.6                       |
| NNNGEEASTEGTCCPV              | 1738.7                        | 1738.7                       |
| HWVCEAGLGQTSQESH <sup>1</sup> | 1825.8                        | 1825.6                       |
| HPDGRWNDDVCQRPY <sup>1</sup>  | 1914.8                        | 1914.7                       |

Sequence Coverage (67.8%)

ASMTGGQMGRILVTLRTDFSNFTSNTVAEIQALTSQGSSLEETIASLKAIEVEGFKQERQAVHSEMLLRVQQLVQDLK  
 KLTCQVATLNNNGEEASTEGTCCPVNWEHQDSCYWFHSGMSWAEAEKYCQLKNAHLVVINSREEQNFVQKYL  
 SAYTWMGLSDPEGAWKWVDGTDYATGFQNWKPGQPDDWQGHGLGGEDCAHFHPDGRWNDDVCQRPYHWVCE  
 AGLGQTSQESH

**Figure S27D.** Combined sequence coverage of tryptic and chymotryptic peptide mass fingerprinting of hMGL by MALDI-TOF MS.

**(D)**

Sequence coverage (89.4%)

ASMTGGQQMGRILVTLRTDFSNFTSNTVAEIQALTSQGSLEETIASLKAEVEGFKQERQAVHSEMLLRVQQLVQDLK  
KLTCQVATLNNNGEEASTEGTCCPVNWVEHQDSCYWFSHSGMSWAEAEKYCQLKNAHLVVINSREEQNFVQKYLG  
SAYTWMGLSDPEGAWKWVDGTDYATGFQNWKPGQPDDWQGHGLGGEDCAHFHPDGRWNDDVCQRPYHWVCE  
AGLGQTSQESH

## Isothermal Titration Calorimetry

**Figure S28.** ITC binding data for free glycan-MGL interactions. Isotherms corresponding to binding of (A)  $\alpha/\beta$ -GalNAc (1.50 mM) with hMGL (29.6  $\mu$ M), (B) Thr-Tn (1.50 mM) with hMGL (50.0  $\mu$ M), (C)  $\alpha$ -Me-GalNAc (1.50 mM) with hMGL (50.0  $\mu$ M), and (D)  $\beta$ -Me-GalNAc (1.50 mM) with hMGL (50.0  $\mu$ M). The titrations, integrated data, and signature plots are shown in the upper, middle, and lower panels. The titrations were performed in buffered (10 mM HEPES sodium salt, 50 mM NaCl, and 2 mM  $\text{CaCl}_2$  at pH 7.4)  $\text{H}_2\text{O}$  at 25°C.

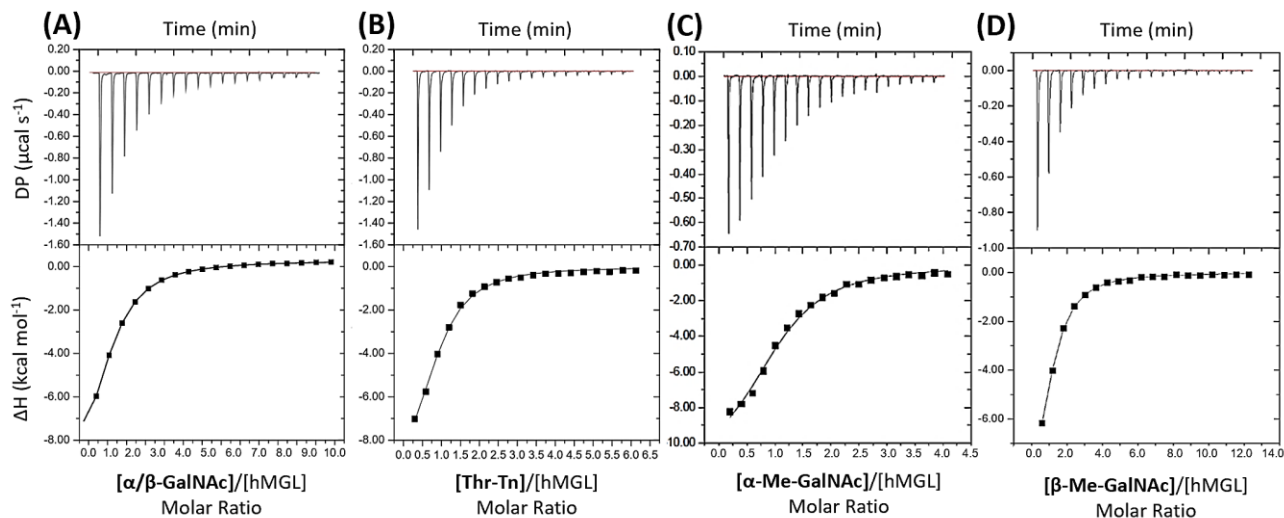

|                                 |                   |                                 |                   |                                 |                   |                                 |                   |
|---------------------------------|-------------------|---------------------------------|-------------------|---------------------------------|-------------------|---------------------------------|-------------------|
| n                               | 0.99              | n                               | 1.02              | n                               | 1.03              | n                               | 0.97              |
| $K_a$ ( $10^4 \text{ M}^{-1}$ ) | $5.65 \pm 0.28$   | $K_a$ ( $10^4 \text{ M}^{-1}$ ) | $6.17 \pm 0.01$   | $K_a$ ( $10^4 \text{ M}^{-1}$ ) | $12.90 \pm 0.40$  | $K_a$ ( $10^4 \text{ M}^{-1}$ ) | $7.10 \pm 0.26$   |
| $\Delta H$ (kcal/mol)           | $-11.30 \pm 0.13$ | $\Delta H$ (kcal/mol)           | $-11.08 \pm 0.49$ | $\Delta H$ (kcal/mol)           | $-11.60 \pm 0.48$ | $\Delta H$ (kcal/mol)           | $-11.62 \pm 0.45$ |
| $-T\Delta S$ (kcal/mol)         | 4.81              | $-T\Delta S$ (kcal/mol)         | 4.30              | $-T\Delta S$ (kcal/mol)         | 4.65              | $-T\Delta S$ (kcal/mol)         | 5.01              |
| $K_d$ ( $\mu\text{M}$ )         | $17.70 \pm 0.28$  | $K_d$ ( $\mu\text{M}$ )         | $16.20 \pm 0.01$  | $K_d$ ( $\mu\text{M}$ )         | $7.80 \pm 0.40$   | $K_d$ ( $\mu\text{M}$ )         | $14.10 \pm 0.26$  |

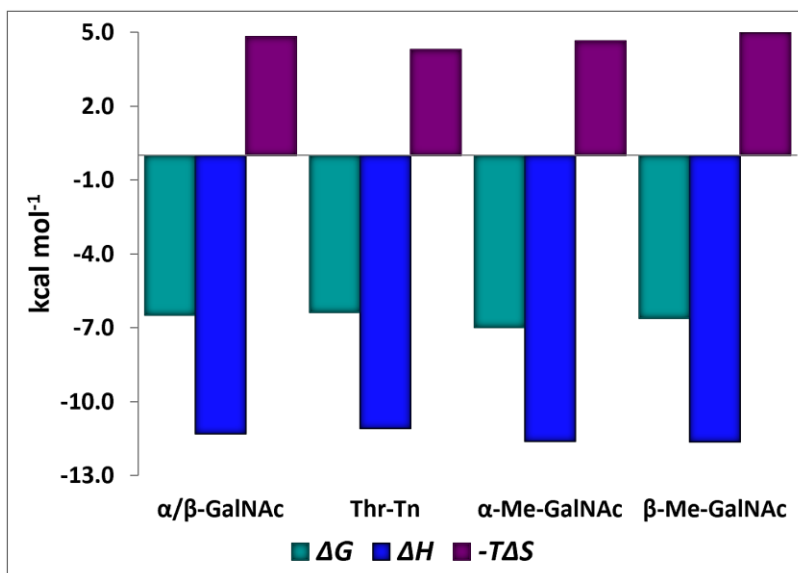

**Figure S29.** ITC binding data for MUC1 glycopeptide-MGL interactions. Isotherms corresponding to binding of (A) MUC1-Thr4 (0.50 mM) with hMGL (11.5  $\mu$ M), (B) MUC1-Thr9 (0.44 mM) with hMGL (19.0  $\mu$ M), (C) MUC1-Thr16 (0.50 mM) with hMGL (22.0  $\mu$ M), (D) MUC1-Thr9,16 (0.50 mM) with hMGL (19.0  $\mu$ M), (E) MUC1-Thr4,16 (0.50 mM) with hMGL (20.0  $\mu$ M), (F) MUC1-Thr4,9 (0.50 mM) with hMGL (11.0  $\mu$ M), and (G) MUC1-Thr4,9,16 (0.25 mM) with hMGL (20.0  $\mu$ M). The titrations, integrated data, and signature plots are shown in the upper, middle, and lower panels. The titrations were performed in buffered (10 mM HEPES sodium salt, 50 mM NaCl, and 2 mM CaCl<sub>2</sub> at pH 7.4) H<sub>2</sub>O at 25°C.

**MUC1-Thr4:** HGVT\*SAPDTRPAPGSTAPPA

**MUC1-Thr9,16:** HGVTAPDT\*RPAPGST\*APPA

**MUC1-Thr9:** HGVTAPDT\*RPAPGSTAPPA

**MUC1-Thr4,16:** HGVT\*SAPDTRPAPGST\*APPA

**MUC1-Thr16:** HGVTAPDTRPAPGST\*APPA

**MUC1-Thr4,9:** HGVT\*SAPDT\*RPAPGSTAPPA

**MUC1-Thr4,9,16:** HGVT\*SAPDT\*RPAPGST\*APPA

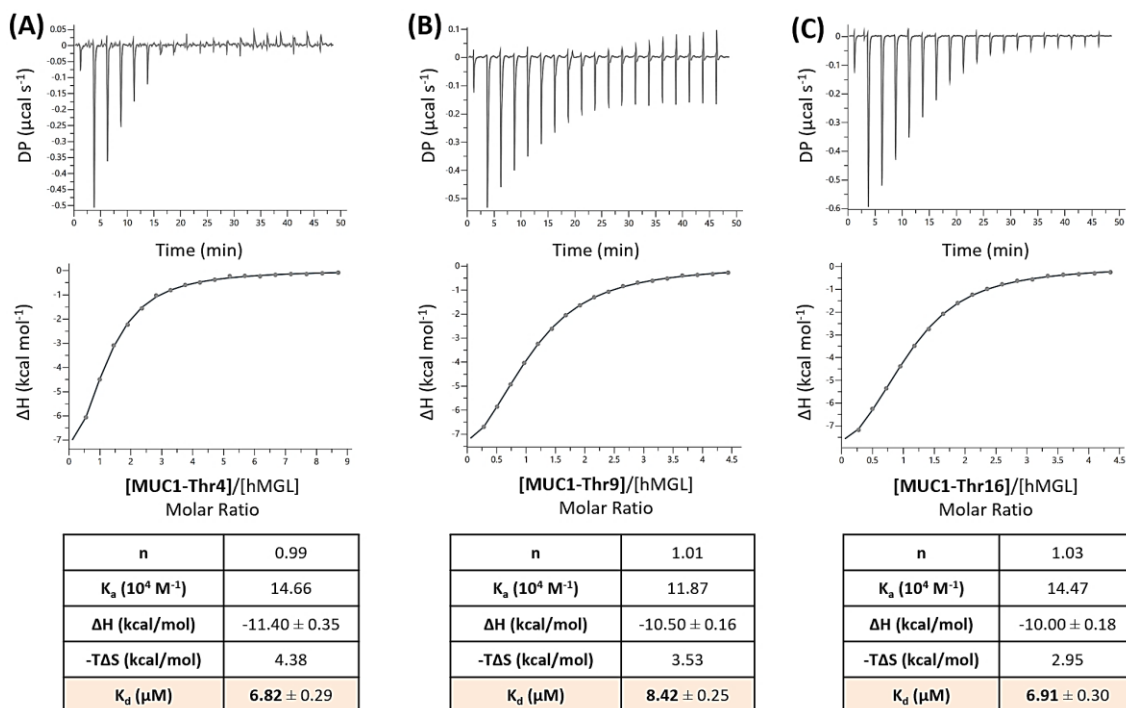

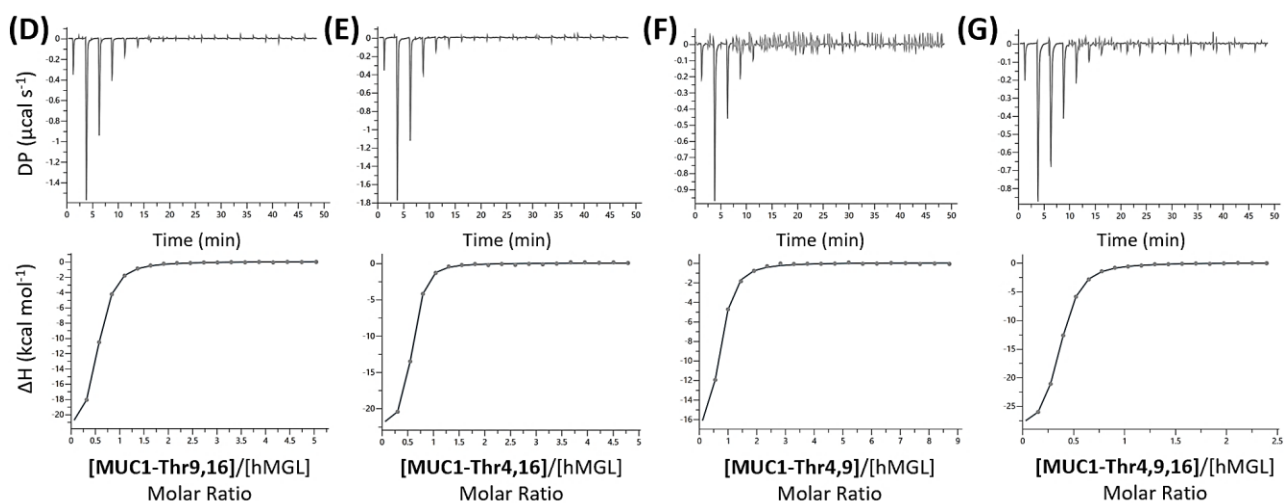

|                            |                   |
|----------------------------|-------------------|
| n                          | 0.46              |
| $K_a$ ( $10^4$ M $^{-1}$ ) | 81.30             |
| $\Delta H$ (kcal/mol)      | $-24.00 \pm 0.16$ |
| $-T\Delta S$ (kcal/mol)    | 16.00             |
| $K_d$ ( $\mu$ M)           | $1.23 \pm 0.02$   |

|                            |                   |
|----------------------------|-------------------|
| n                          | 0.48              |
| $K_a$ ( $10^4$ M $^{-1}$ ) | 144.92            |
| $\Delta H$ (kcal/mol)      | $-22.80 \pm 0.20$ |
| $-T\Delta S$ (kcal/mol)    | 14.30             |
| $K_d$ ( $\mu$ M)           | $0.69 \pm 0.02$   |

|                            |                   |
|----------------------------|-------------------|
| n                          | 0.50              |
| $K_a$ ( $10^4$ M $^{-1}$ ) | 70.92             |
| $\Delta H$ (kcal/mol)      | $-20.70 \pm 1.12$ |
| $-T\Delta S$ (kcal/mol)    | 12.70             |
| $K_d$ ( $\mu$ M)           | $1.41 \pm 0.13$   |

|                            |                   |
|----------------------------|-------------------|
| n                          | 0.32              |
| $K_a$ ( $10^4$ M $^{-1}$ ) | 166.67            |
| $\Delta H$ (kcal/mol)      | $-30.30 \pm 0.11$ |
| $-T\Delta S$ (kcal/mol)    | 21.80             |
| $K_d$ ( $\mu$ M)           | $0.60 \pm 0.01$   |

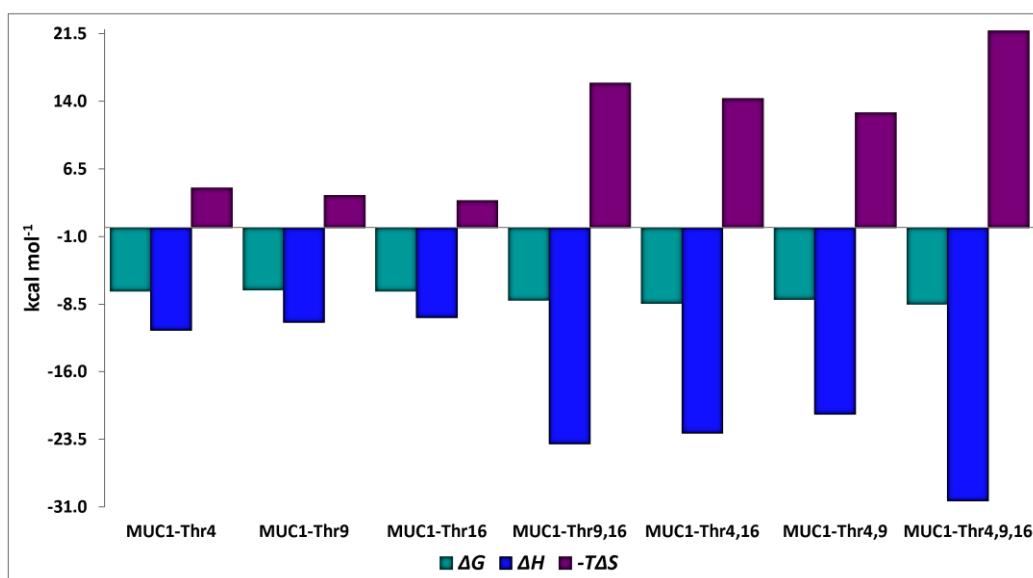

**Figure S30.** Thermodynamics of free GalNAc and MUC1 glycopeptide-hMGL interactions. Isotherms corresponding to binding of (A)  $\alpha/\beta$ -GalNAc (1.50 mM) with hMGL (28.6  $\mu$ M), (B) MUC1-Thr4 (0.50 mM) with hMGL (21.0  $\mu$ M), (C) MUC1-Thr9 (0.50 mM) with hMGL (17.5  $\mu$ M), (D) MUC1-Thr16 (0.50 mM) with hMGL (14.4  $\mu$ M), (E) MUC1-Thr9,16 (0.50 mM) with hMGL (20.0  $\mu$ M), (F) MUC1-Thr4,16 (0.50 mM) with hMGL (19.0  $\mu$ M), (G) MUC1-Thr4,9 (0.50 mM) with hMGL (24.5  $\mu$ M), and (H) MUC1-Thr4,9,16 (0.25 mM) with hMGL (21.0  $\mu$ M). The titrations, integrated data, and signature plots are shown in the upper, middle, and lower panels. The titrations were performed in buffered (10 mM HEPES sodium salt, 50 mM NaCl, and 2 mM  $\text{CaCl}_2$  at pH 7.4)  $\text{D}_2\text{O}$  at 25  $^\circ\text{C}$ .

**MUC1-Thr4:** HGVT\*SAPDTRPAPGSTAPPA

**MUC1-Thr9:** HGVTAPDT\*RPAPGSTAPPA

**MUC1-Thr16:** HGVTAPDTRPAPGST\*APPA

**MUC1-Thr9,16:** HGVTAPDT\*RPAPGST\*APPA

**MUC1-Thr4,16:** HGVT\*SAPDTRPAPGST\*APPA

**MUC1-Thr4,9:** HGVT\*SAPDT\*RPAPGSTAPPA

**MUC1-Thr4,9,16:** HGVT\*SAPDT\*RPAPGST\*APPA

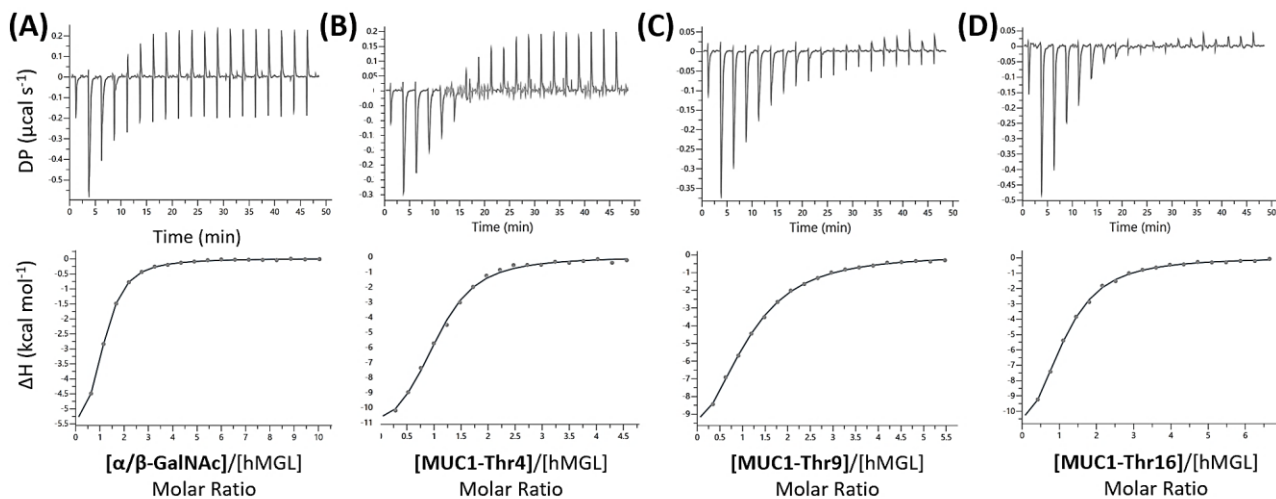

|                                 |                  |
|---------------------------------|------------------|
| n                               | 0.97             |
| $K_s$ ( $10^4 \text{ M}^{-1}$ ) | 13.79            |
| $\Delta H$ (kcal/mol)           | $-6.81 \pm 0.10$ |
| $-\Delta S$ (kcal/mol)          | -0.20            |
| $K_d$ ( $\mu\text{M}$ )         | $7.25 \pm 0.02$  |

|                                 |                   |
|---------------------------------|-------------------|
| n                               | 1.00              |
| $K_s$ ( $10^4 \text{ M}^{-1}$ ) | 26.88             |
| $\Delta H$ (kcal/mol)           | $-12.50 \pm 0.50$ |
| $-\Delta S$ (kcal/mol)          | 5.13              |
| $K_d$ ( $\mu\text{M}$ )         | $3.72 \pm 0.47$   |

|                                 |                   |
|---------------------------------|-------------------|
| n                               | 1.01              |
| $K_s$ ( $10^4 \text{ M}^{-1}$ ) | 10.84             |
| $\Delta H$ (kcal/mol)           | $-14.10 \pm 0.55$ |
| $-\Delta S$ (kcal/mol)          | 7.22              |
| $K_d$ ( $\mu\text{M}$ )         | $9.22 \pm 0.61$   |

|                                 |                   |
|---------------------------------|-------------------|
| n                               | 1.01              |
| $K_s$ ( $10^4 \text{ M}^{-1}$ ) | 16.75             |
| $\Delta H$ (kcal/mol)           | $-14.18 \pm 0.63$ |
| $-\Delta S$ (kcal/mol)          | 7.63              |
| $K_d$ ( $\mu\text{M}$ )         | $5.97 \pm 0.48$   |



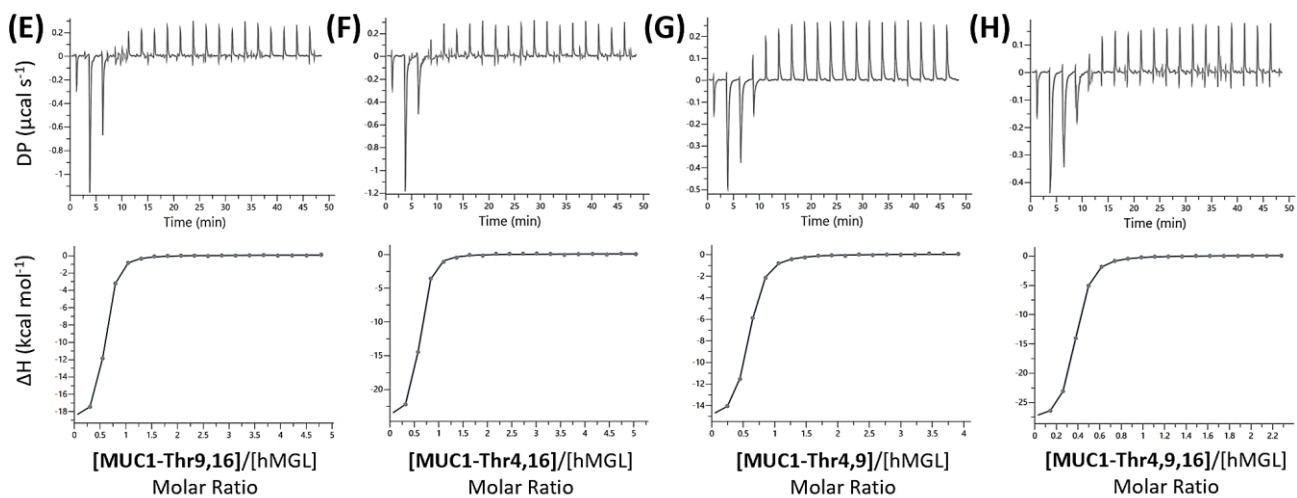

|                                 |                   |
|---------------------------------|-------------------|
| n                               | 0.49              |
| $K_a$ ( $10^4 \text{ M}^{-1}$ ) | 263.15            |
| $\Delta H$ (kcal/mol)           | $-19.20 \pm 0.01$ |
| $-\Delta S$ (kcal/mol)          | 10.40             |
| $K_d$ ( $\mu\text{M}$ )         | $0.38 \pm 0.01$   |

|                                 |                   |
|---------------------------------|-------------------|
| n                               | 0.50              |
| $K_a$ ( $10^4 \text{ M}^{-1}$ ) | 263.15            |
| $\Delta H$ (kcal/mol)           | $-24.60 \pm 0.17$ |
| $-\Delta S$ (kcal/mol)          | 15.80             |
| $K_d$ ( $\mu\text{M}$ )         | $0.38 \pm 0.02$   |

|                                 |                   |
|---------------------------------|-------------------|
| n                               | 0.50              |
| $K_a$ ( $10^4 \text{ M}^{-1}$ ) | 144.50            |
| $\Delta H$ (kcal/mol)           | $-15.60 \pm 0.01$ |
| $-\Delta S$ (kcal/mol)          | 7.22              |
| $K_d$ ( $\mu\text{M}$ )         | $0.69 \pm 0.03$   |

|                                 |                   |
|---------------------------------|-------------------|
| n                               | 0.32              |
| $K_a$ ( $10^4 \text{ M}^{-1}$ ) | 338.98            |
| $\Delta H$ (kcal/mol)           | $-28.50 \pm 0.01$ |
| $-\Delta S$ (kcal/mol)          | 19.50             |
| $K_d$ ( $\mu\text{M}$ )         | $0.29 \pm 0.01$   |

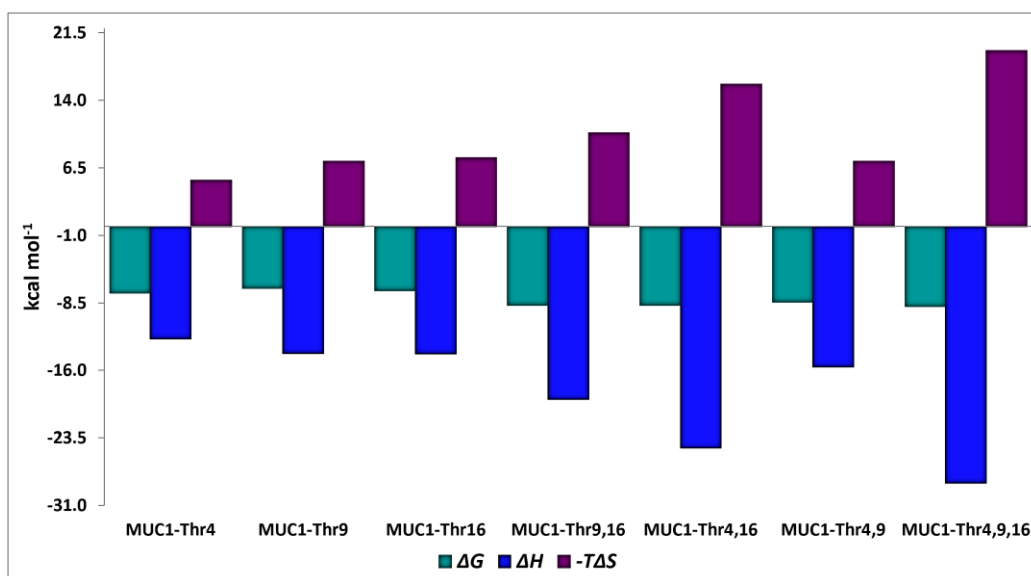

## NITPIC, SEDPHAT, and GUSSI

**Figure S31.** NITPIC/SEDPHAT/GUSSI thermodynamic values in water. Thermodynamics of MUC1 glycopeptide-hMGL interactions. Isotherms corresponding to binding of (A)  $\alpha/\beta$ -GalNAc (1.50 mM) with hMGL (29.6  $\mu$ M), (B) MUC1-Thr4 (0.50 mM) with hMGL (11.5  $\mu$ M), (C) MUC1-Thr9 (0.44 mM) with hMGL (19.0  $\mu$ M), (D) MUC1-Thr16 (0.50 mM) with hMGL (22.0  $\mu$ M), (E) MUC1-Thr9,16 (0.50 mM) with hMGL (19.0  $\mu$ M), (F) MUC1-Thr4,16 (0.50 mM) with hMGL (20.0  $\mu$ M), (G) MUC1-Thr4,9 (0.50 mM) with hMGL (22.0  $\mu$ M), and (H) MUC1-Thr4,9,16 (0.25 mM) with hMGL (20.0  $\mu$ M). Monte-Carlo error analysis.

| Ligand         | Entry | $K_a$<br>$\times 10^4 \text{ M}^{-1}$ | $\Delta G$<br>$\text{kcal mol}^{-1}$ | $\Delta H$<br>$\text{kcal mol}^{-1}$ | $-T\Delta S$<br>$\text{kcal mol}^{-1}$ | $n$  | $K_d$<br>$\mu\text{M}$ | $\chi^2$ |
|----------------|-------|---------------------------------------|--------------------------------------|--------------------------------------|----------------------------------------|------|------------------------|----------|
| GalNAc         |       | 5.23<br>$\pm 1.08\text{e-}3$          | -6.44                                | -16.88<br>$\pm 7.49\text{e-}2$       | 10.44                                  | 0.96 | 19.11                  | 0.416    |
| MUC1-Thr4      | 7     | 12.89<br>$\pm 4.61\text{e-}4$         | -6.97                                | -12.38<br>$\pm 1.20\text{e-}2$       | 5.41                                   | 0.91 | 8.90                   | 0.321    |
| MUC1-Thr9      | 8     | 10.25<br>$\pm 7.28\text{e-}4$         | -6.83                                | -11.82<br>$\pm 4.79\text{e-}3$       | 4.99                                   | 1.17 | 9.75                   | 0.351    |
| MUC1-Thr16     | 9     | 10.27<br>$\pm 7.27\text{e-}5$         | -6.83                                | -11.01<br>$\pm 1.00\text{e-}3$       | 4.17                                   | 0.91 | 11.30                  | 0.129    |
| MUC1-Thr9,16   | 10    | 78.18<br>$\pm 1.78\text{e-}5$         | -8.04                                | -23.06<br>$\pm 3.19\text{e-}4$       | 15.03                                  | 0.46 | 2.80                   | 0.444    |
| MUC1-Thr4,16   | 11    | 135.20<br>$\pm 1.26\text{e-}5$        | -8.36                                | -2.11<br>$\pm 1.13\text{e-}4$        | 14.72                                  | 0.47 | 1.50                   | 0.212    |
| MUC1-Thr4,9    | 12    | 33.97<br>$\pm 2.88\text{e-}5$         | -7.54                                | -15.77<br>$\pm 4.56\text{e-}4$       | 8.22                                   | 0.49 | 2.94                   | 1.24     |
| MUC1-Thr4,9,16 | 13    | 163.80<br>$\pm 6.29\text{e-}5$        | -8.47                                | -32.26<br>$\pm 1.11\text{e-}3$       | 23.78                                  | 0.33 | 0.61                   | 0.034    |

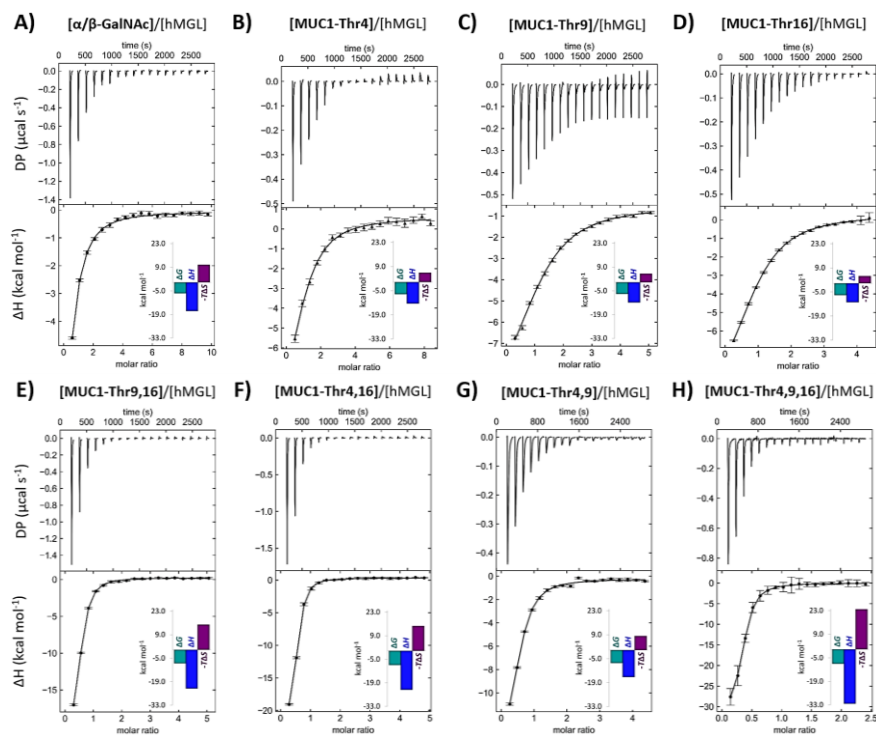

NITPIC/SEDPHAT/GUSSI thermodynamic values in deuterium oxide. Thermodynamics of MUC1 glycopeptide-hMGL interactions. Isotherms corresponding to binding of (A)  $\alpha/\beta$ -GalNAc (1.50 mM) with hMGL (28.6  $\mu$ M), (B) MUC1-Thr4 (0.50 mM) with hMGL (21.0  $\mu$ M), (C) MUC1-Thr9 (0.44 mM) with hMGL (17.5  $\mu$ M), (D) MUC1-Thr16 (0.50 mM) with hMGL (14.4  $\mu$ M), (E) MUC1-Thr9,16 (0.50 mM) with hMGL (20.0  $\mu$ M), (F) MUC1-Thr4,16 (0.50 mM) with hMGL (19.0  $\mu$ M), (G) MUC1-Thr4,9 (0.50 mM) with hMGL (24.5  $\mu$ M), and (H) MUC1-Thr4,9,16 (0.25 mM) with hMGL (21.0  $\mu$ M). Monte-Carlo error analysis.

| Ligand         | Entry | $K_a$<br>$\times 10^4 \text{ M}^{-1}$ | $\Delta G$<br>$\text{kcal mol}^{-1}$ | $\Delta H$<br>$\text{kcal mol}^{-1}$ | $-T\Delta S$<br>$\text{kcal mol}^{-1}$ | $n$  | $K_d$<br>$\mu\text{M}$ | $\chi^2$ |
|----------------|-------|---------------------------------------|--------------------------------------|--------------------------------------|----------------------------------------|------|------------------------|----------|
| GalNAc         |       | 11.45<br>$\pm 3.36\text{e-}4$         | -6.90                                | -6.91<br>$\pm 3.30\text{e-}3$        | 0.01                                   | 0.97 | 8.60                   | 1.11     |
| MUC1-Thr4      | 7     | 23.59<br>$\pm 1.22\text{e-}4$         | -7.33                                | -13.01<br>$\pm 1.00\text{e-}3$       | 5.68                                   | 0.96 | 3.70                   | 0.156    |
| MUC1-Thr9      | 8     | 9.89<br>$\pm 1.76\text{e-}4$          | -6.82                                | -18.02<br>$\pm 5.79\text{e-}3$       | 11.21                                  | 0.82 | 12.60                  | 0.942    |
| MUC1-Thr16     | 9     | 19.47<br>$\pm 4.67\text{e-}4$         | -7.22                                | -14.74<br>$\pm 2.11\text{e-}3$       | 7.33                                   | 1.07 | 5.50                   | 0.646    |
| MUC1-Thr9,16   | 10    | 265.90<br>$\pm 3.60\text{e-}5$        | -8.77                                | -18.86<br>$\pm 1.40\text{e-}4$       | 10.10                                  | 0.47 | 0.38                   | 0.126    |
| MUC1-Thr4,16   | 11    | 325.70<br>$\pm 2.52\text{e-}5$        | -8.89                                | -22.13<br>$\pm 1.01\text{e-}4$       | 13.25                                  | 0.44 | 0.62                   | 0.185    |
| MUC1-Thr4,9    | 12    | 136.80<br>$\pm 9.53\text{e-}6$        | -8.37                                | -15.26<br>$\pm 5.34\text{e-}5$       | 6.88                                   | 0.50 | 1.40                   | 0.996    |
| MUC1-Thr4,9,16 | 13    | 257.00<br>$\pm 2.33\text{e-}5$        | -8.75                                | -29.11<br>$\pm 3.50\text{e-}4$       | 20.37                                  | 0.32 | 1.10                   | 0.159    |

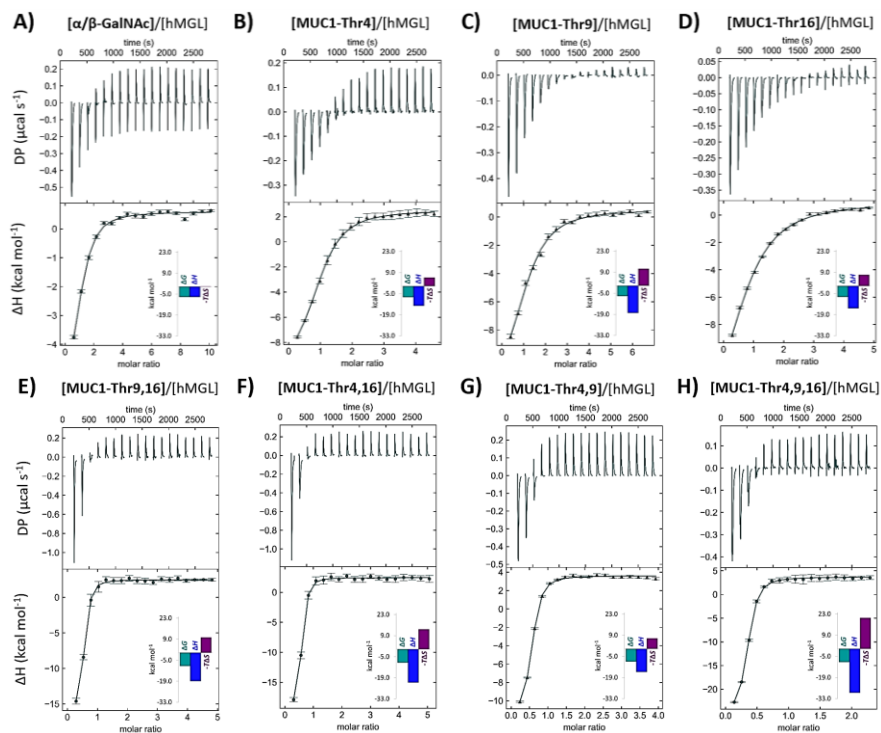

# AFFINImeter KinITC

Figure S32. Affinimeter KinITC data in water.

(A) MUC1-Thr16 (9)

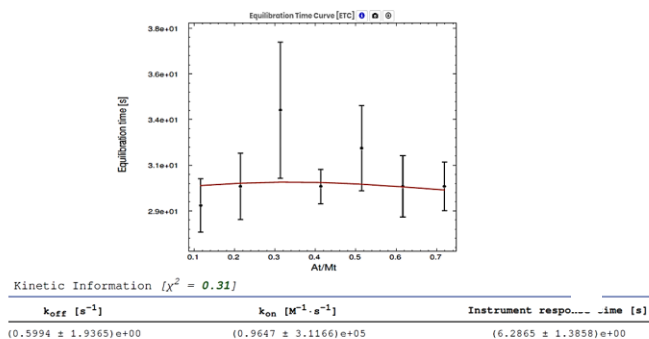

(B) MUC1-Thr9,16 (10)

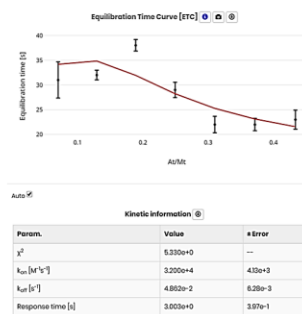

(C) MUC1-Thr4,16 (11)

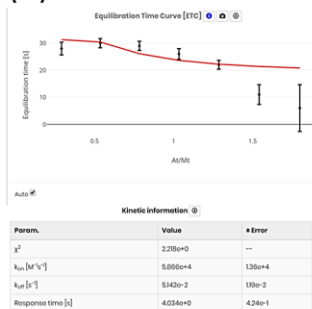

(D) MUC1-Thr4,9 (12)

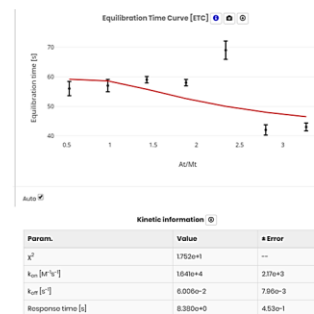

(E) MUC1-Thr4,9,16 (13)

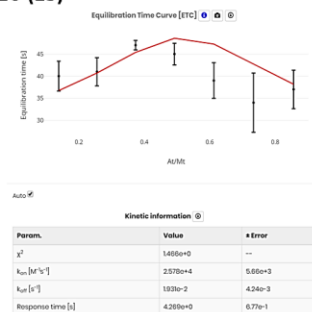

Figure S33. AFFINImeter KinITC data in deuterium.

| Ligand         | Entry     | $k_{on}$<br>$\times 10^6 M^{-1} s^{-1}$ | $k_{off}$<br>$s^{-1}$ | $\tau$<br>$s$ |
|----------------|-----------|-----------------------------------------|-----------------------|---------------|
| $D_2O$         |           |                                         |                       |               |
| GalNAc         |           | 0.0070                                  | 0.0423                | 23.60         |
| MUC1-Thr4      | <b>7</b>  | 0.0046                                  | 0.0149                | 66.84         |
| MUC1-Thr9      | <b>8</b>  | -                                       | -                     | -             |
| MUC1-Thr16     | <b>9</b>  | -                                       | -                     | -             |
| MUC1-Thr9,16   | <b>10</b> | -                                       | -                     | -             |
| MUC1-Thr4,16   | <b>11</b> | 0.0446                                  | 0.0058                | 172.41        |
| MUC1-Thr4,9    | <b>12</b> | 0.0257                                  | 0.0203                | 49.06         |
| MUC1-Thr4,9,16 | <b>13</b> | 0.0351                                  | 0.0162                | 61.72         |

(A)  $\alpha/\beta$ -GalNAc

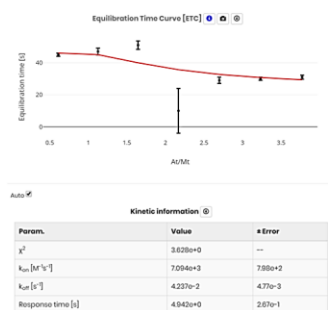

(B) MUC1-Thr4 (7)

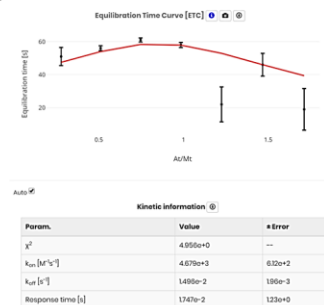

(C) MUC1-Thr4,16 (11)

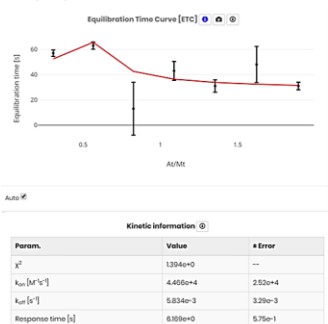

(D) MUC1-Thr4,9 (12)

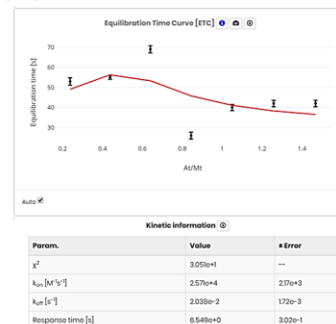

(E) MUC1-Thr4,9,16 (13)

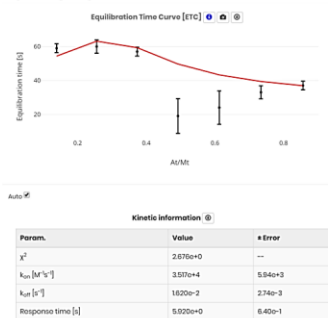

Supplement: bi0c00942_si_001.pdf [file bi0c00942_si_001.pdf]
